# Supplementary material
Source: PubMed Central journal article supplement (PMC3750725)
Supplement: NIHMS440479-supplement-mmc1.pdf [file NIHMS440479-supplement-mmc1.pdf]

# Supporting Information

## Fragment-Based Drug Design and Identification of HJC0123, A Novel Orally

### Bioavailable STAT3 Inhibitor for Cancer Therapy

Haijun Chen<sup>a,†</sup>, Zhengduo Yang<sup>b,†</sup>, Chunyong Ding<sup>a</sup>, Lili Chu<sup>b</sup>, Yusong Zhang<sup>b</sup>, Kristin Terry<sup>b</sup>,

Huiling Liu<sup>a</sup>, Qiang Shen<sup>b,\*</sup> and Jia Zhou<sup>a,\*</sup>

<sup>a</sup>Chemical Biology Program, Department of Pharmacology and Toxicology, University of Texas  
Medical Branch, Galveston, Texas 77555, United States

<sup>b</sup>Department of Clinical Cancer Prevention, Division of Cancer Prevention and Population  
Sciences, The University of Texas M.D. Anderson Cancer Center, Houston, Texas 77030, United  
States

<sup>†</sup>These authors contribute equally to this work.

\*Corresponding authors:

Tel: +1 409 772 9748; Fax: +1 409 772 9818; E-mail address: jizhou@utmb.edu (J. Zhou). Tel:

+1 713 834 6357; Fax: +1 713 834 6350; E-mail address: Qshen@mdanderson.org (Q. Shen).

#### Table of Contents

1. Table S1. Page 2
2. Figure S1. Page 3
3. Figure S2. Page 4
4. Figure S3. Page 5
5. Morphological Changes. Page 6
6. Cell Apoptosis Assay. Page 6
7. Cell Cycle Distribution Analysis. Page 6
8. References. Page 6
9. Copies of <sup>1</sup>H and <sup>13</sup>C NMR spectra Page 7 to Page 30

**Table S1.** Physicochemical parameters<sup>1-2</sup> of selected novel STAT3 inhibitors

| Compound | Chemical Structure                                                                                    | TPSA | cLogP | MW      | HD<br>(nOHNH) | HA<br>(nON) |
|----------|-------------------------------------------------------------------------------------------------------|------|-------|---------|---------------|-------------|
| 5        | 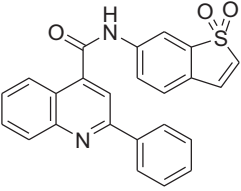<br><b>HJC0123</b>   | 76.1 | 4.20  | 412.47  | 1             | 5           |
| 8        | <br><b>HJC0128</b>   | 42.0 | 5.10  | 352.437 | 1             | 3           |
| 9        | <br><b>HJC0130</b>   | 49.3 | 4.04  | 275.735 | 2             | 3           |
| 10       | <br><b>HJC0371</b>   | 99.9 | 2.63  | 416.256 | 1             | 6           |
| 12       | <br><b>HJC0149</b> | 83.5 | 2.88  | 335.768 | 2             | 5           |
| 19       | <br><b>HJC0136</b> | 76.1 | 4.65  | 438.508 | 1             | 5           |
| 22       | <br><b>HJC0430</b> | 76.1 | 2.95  | 362.41  | 1             | 5           |

cLogP (Average LogP): <http://146.107.217.178/lab/alogps/start.html>

TPSA: <http://www.molinspiration.com/cgi-bin/properties>

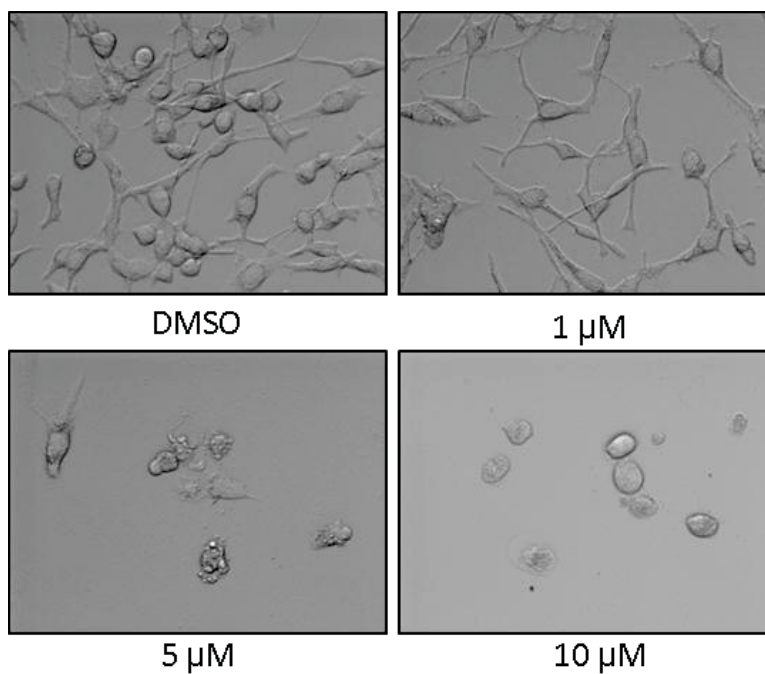

**Figure S1.** Effect of **5 (HJC0123)** on cell growth and cellular morphological change. Exponentially growing MDA-MB-231 breast cancer cells were incubated with **HJC0123** for 48 h. Cell morphology was evaluated under light microscopy.

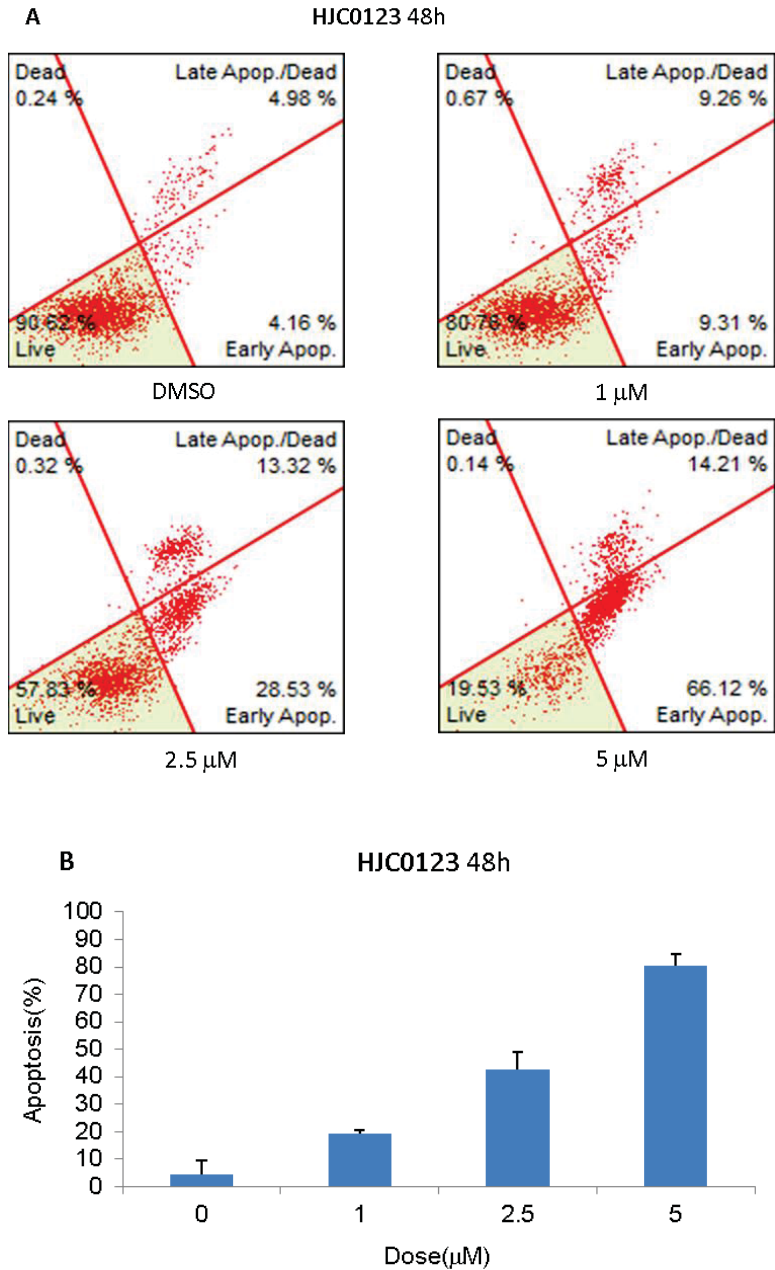

**Figure S2.** Induction of apoptosis on MDA-MB-231 cells by **HJC0123**. Cells were not treated or treated with 1  $\mu$ M, 2.5  $\mu$ M, and 5  $\mu$ M concentration of **HJC0123** for 48 h.

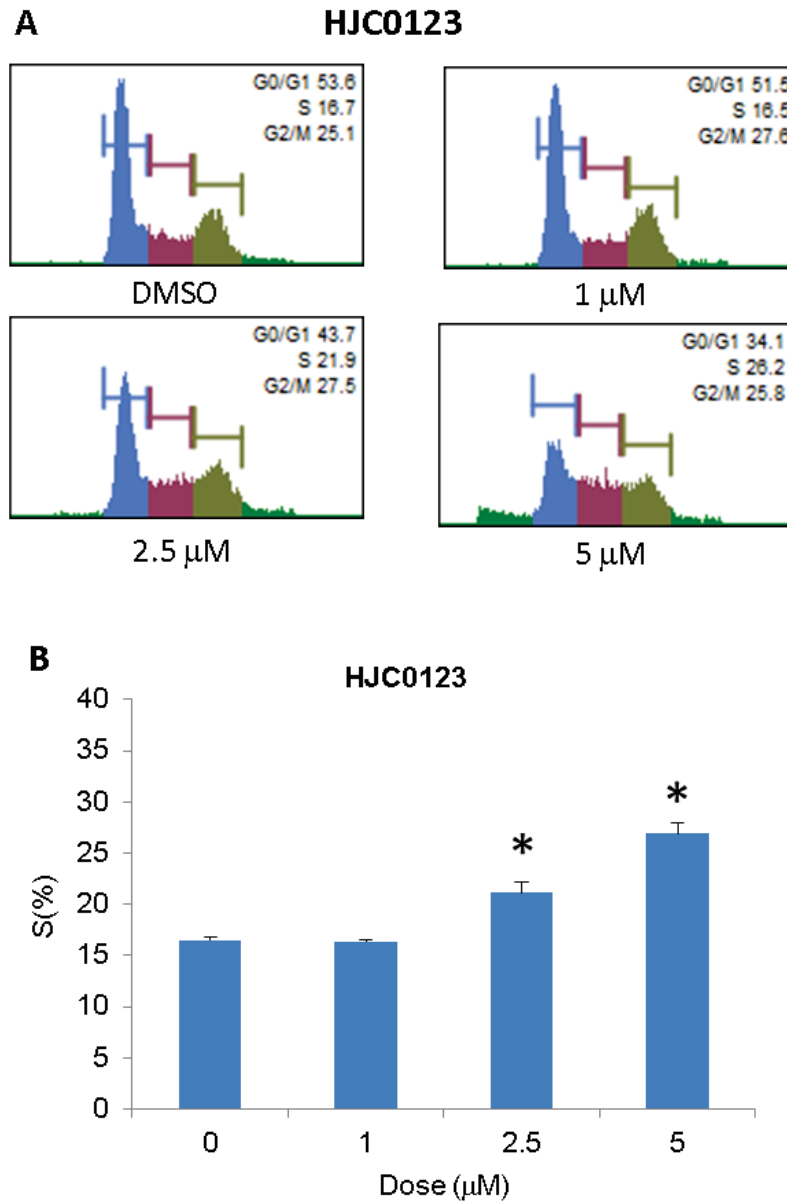

**Figure S3.** Changes of cell cycle distribution in MDA-MB-231 cells after treatment with **HJC0123**. (A) Cell cycle profiles of MDA-MB-231 cells after treated with **HJC0123** for 24 h. (B) The cell cycle distribution expressed in percentage. Cells were not treated or treated with 1 μM, 2.5 μM, and 5 μM concentration of **HJC0123**. Error bar represents standard deviations. \* represents:  $p \leq 0.05$ .

**Morphological Changes.** MDA-MB-231 cells were seeded in 6-well plates at a density of  $2 \times 10^5$  cells/well and grown in RPMI 1640 (Cellgro, VA, USA) overnight at 37 °C in a humidified atmosphere of 95% air and 5% CO<sub>2</sub>. The cells were then treated with vehicle and individual compounds. Growth media was removed 48 h after treatment and replaced with  $1 \times$  PBS. Images were taken using Olympus BX41 microscope (Olympus, Melville, USA).

**Cell Apoptosis Assay.** Breast cancer MDA-MB-231 cells were incubated in 6-well plates ( $2.5 \times 10^5$ /well). Cells were then treated with DMSO, compound **5 (HJC0123)** at different concentrations for 48 h, and then both adherent and floating cells were collected, washed once with PBS. Resuspended cells were incubated with 100  $\mu$ L PBS containing 1% BSA and 100  $\mu$ L Annexin V and dead cell detection reagent at room temperature for 20 min. Apoptosis was measured immediately using the Muse Cell Analyzer with the Muse™ Apoptosis Kit (Catalog No. MCH100105).

**Cell Cycle Distribution Analysis.** Breast cancer MDA-MB-231 cells were incubated in 6-well plates ( $2.5 \times 10^5$ /well). Cells were then treated with vehicle, compound **5 (HJC0123)** at different concentrations. After 24 h and 48 h of treatment, both adherent and floating cells were collected, washed once with PBS and fixed in cold ethanol for at least 4 h. The fixed cells were then washed twice with PBS and resuspended in 200  $\mu$ L cell cycle detection reagent, incubated for 30 min in dark at room temperature. Cell cycle distribution was measured by the Muse Cell Analyzer with Muse™ Cell Cycle Kit (Catalog No. MCH100106) purchased from EMD Millipore.

#### References:

1. Tetko, I. V.; Gasteiger, J.; Todeschini, R.; Mauri, A.; Livingstone, D.; Ertl, P.; Palyulin, V. A.; Radchenko, E. V.; Zefirov, N. S.; Makarenko, A. S.; Tanchuk, V. Y.; Prokopenko, V. V. Virtual computational chemistry laboratory - design and description, *J. Comput. Aid. Mol. Des.* **2005**, *19*, 453-463.
2. Tetko, I. V. Computing chemistry on the web, *Drug Discov. Today* **2005**, *10*, 1497-500.

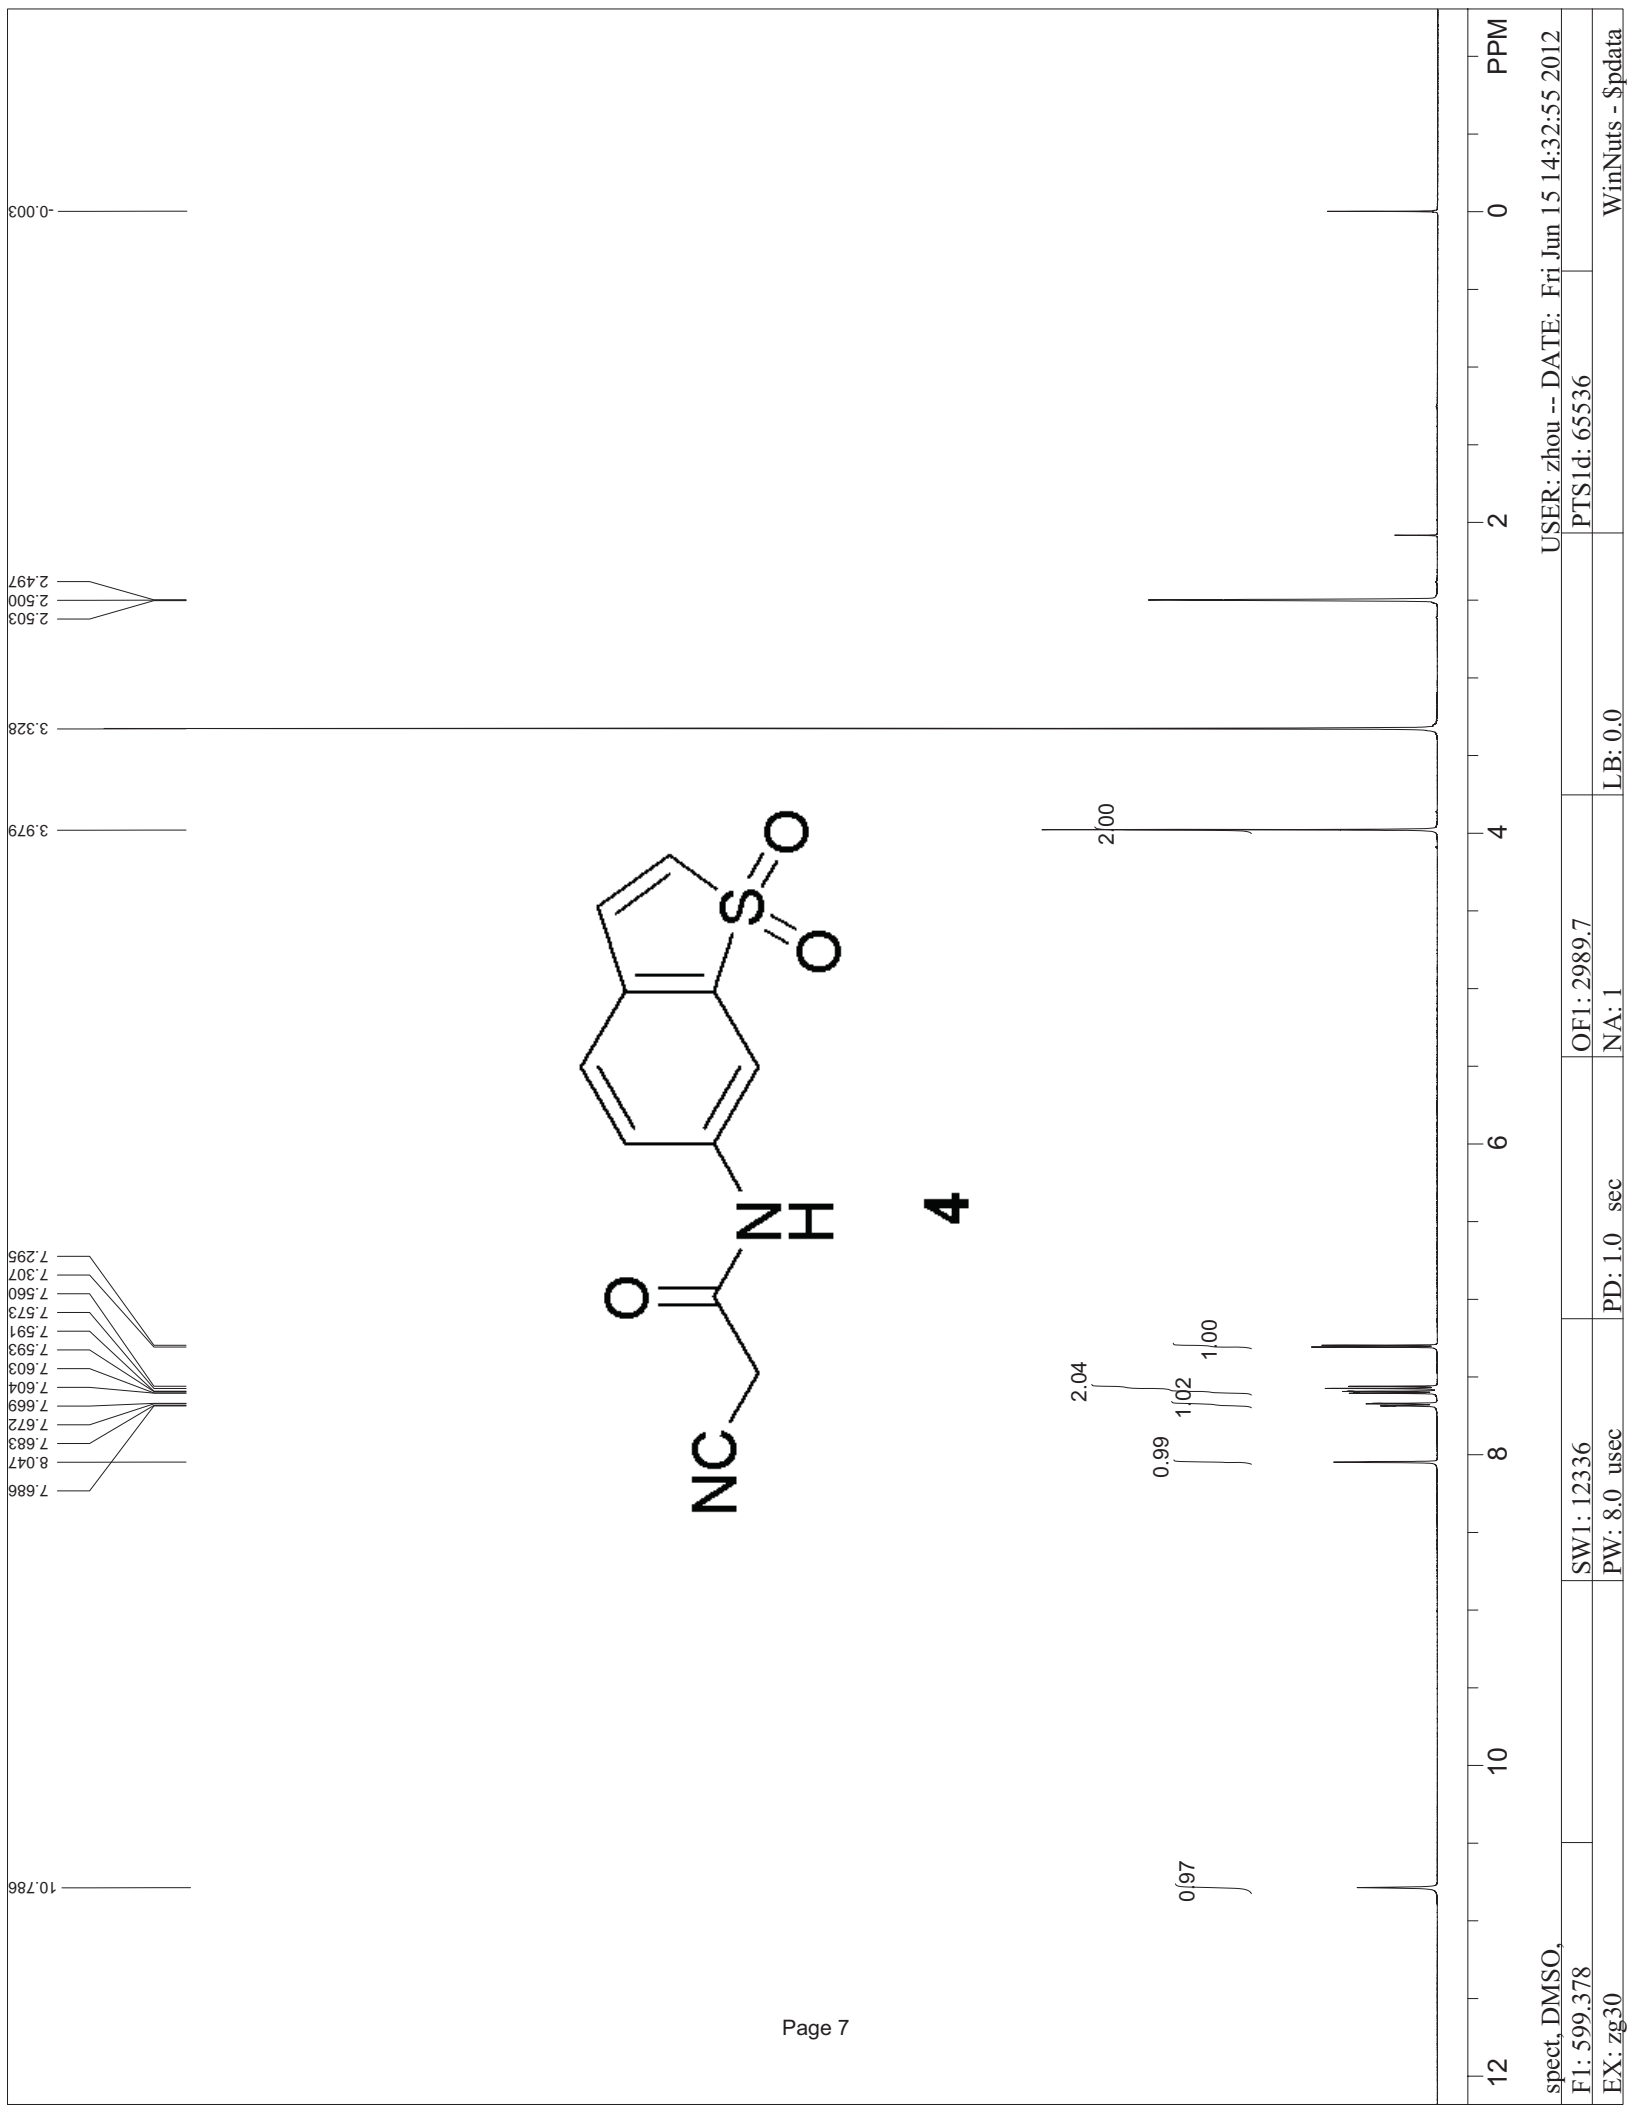

spect, DMSO, USER: zhou -- DATE: Fri Jun 15 14:32:55 2012  
 F1: 599.378 OF1: 2989.7 PTS1d: 65536  
 EX: zg30 PD: 1.0 sec NA: 1 LB: 0.0 WinNuts - \$pdata

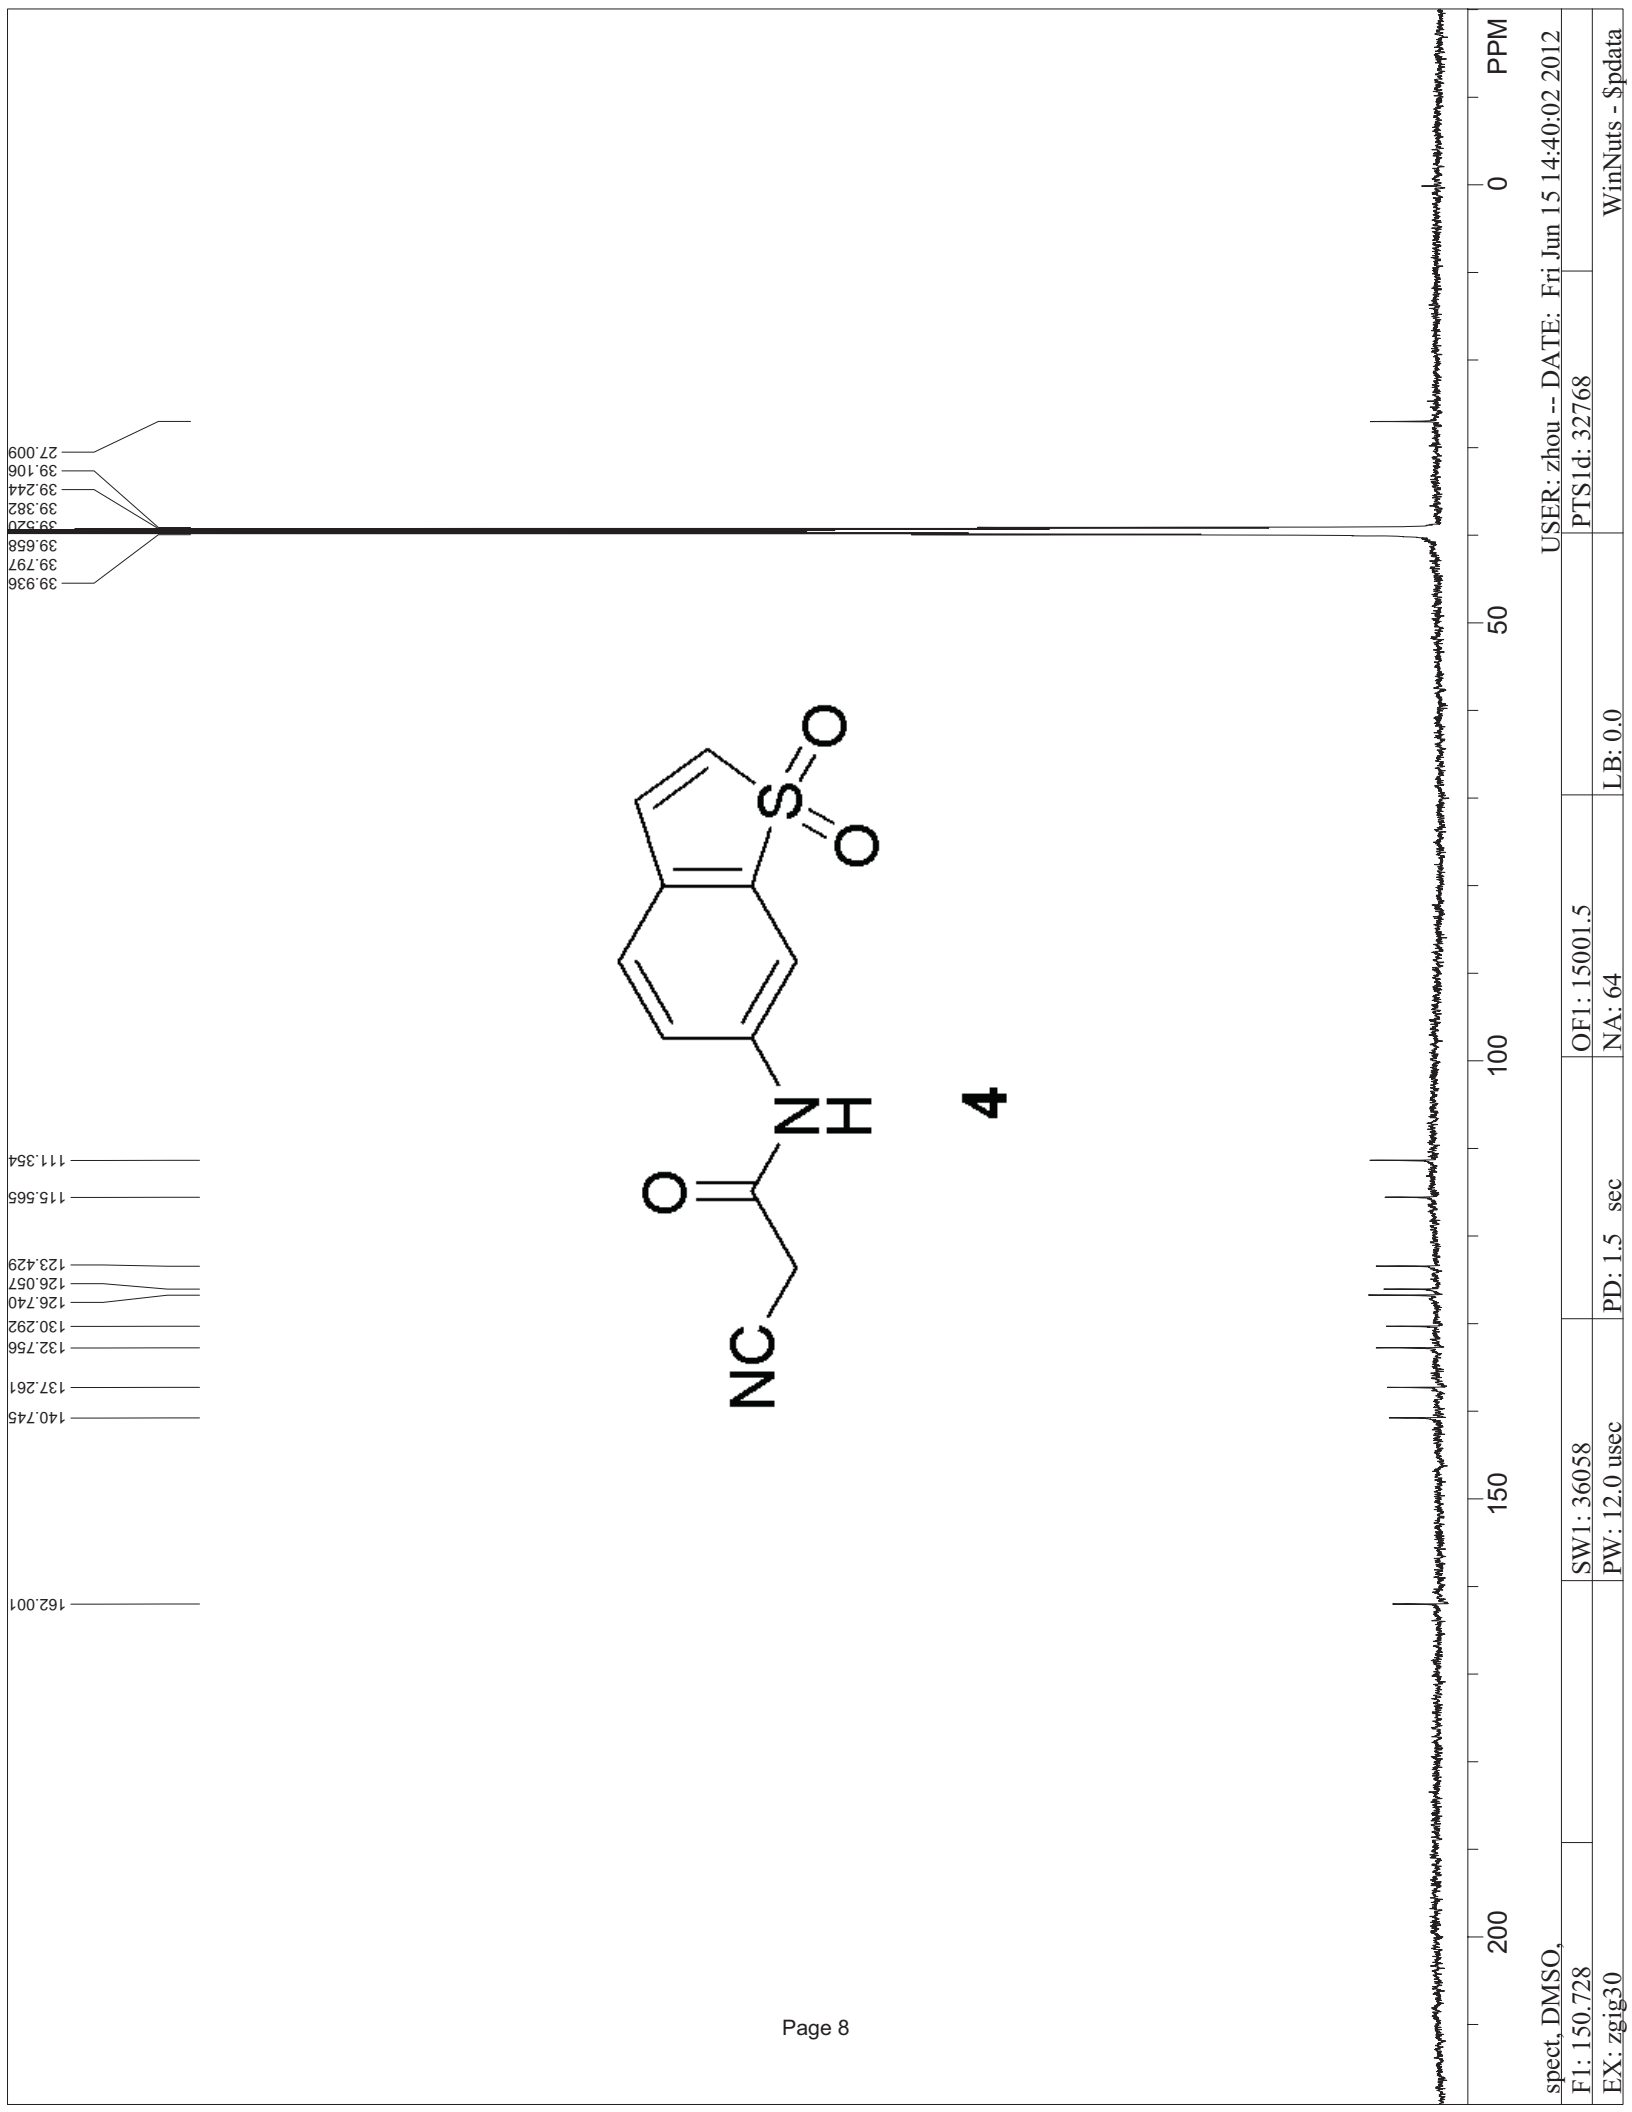

spect, DMSO, USER: zhou -- DATE: Fri Jun 15 14:40:02 2012  
 F1: 150.728 SW1: 36058 OF1: 15001.5 PTS1d: 32768  
 EX: zgig30 PW: 12.0 usec PD: 1.5 sec NA: 64 LB: 0.0 WinNuts - \$pdata



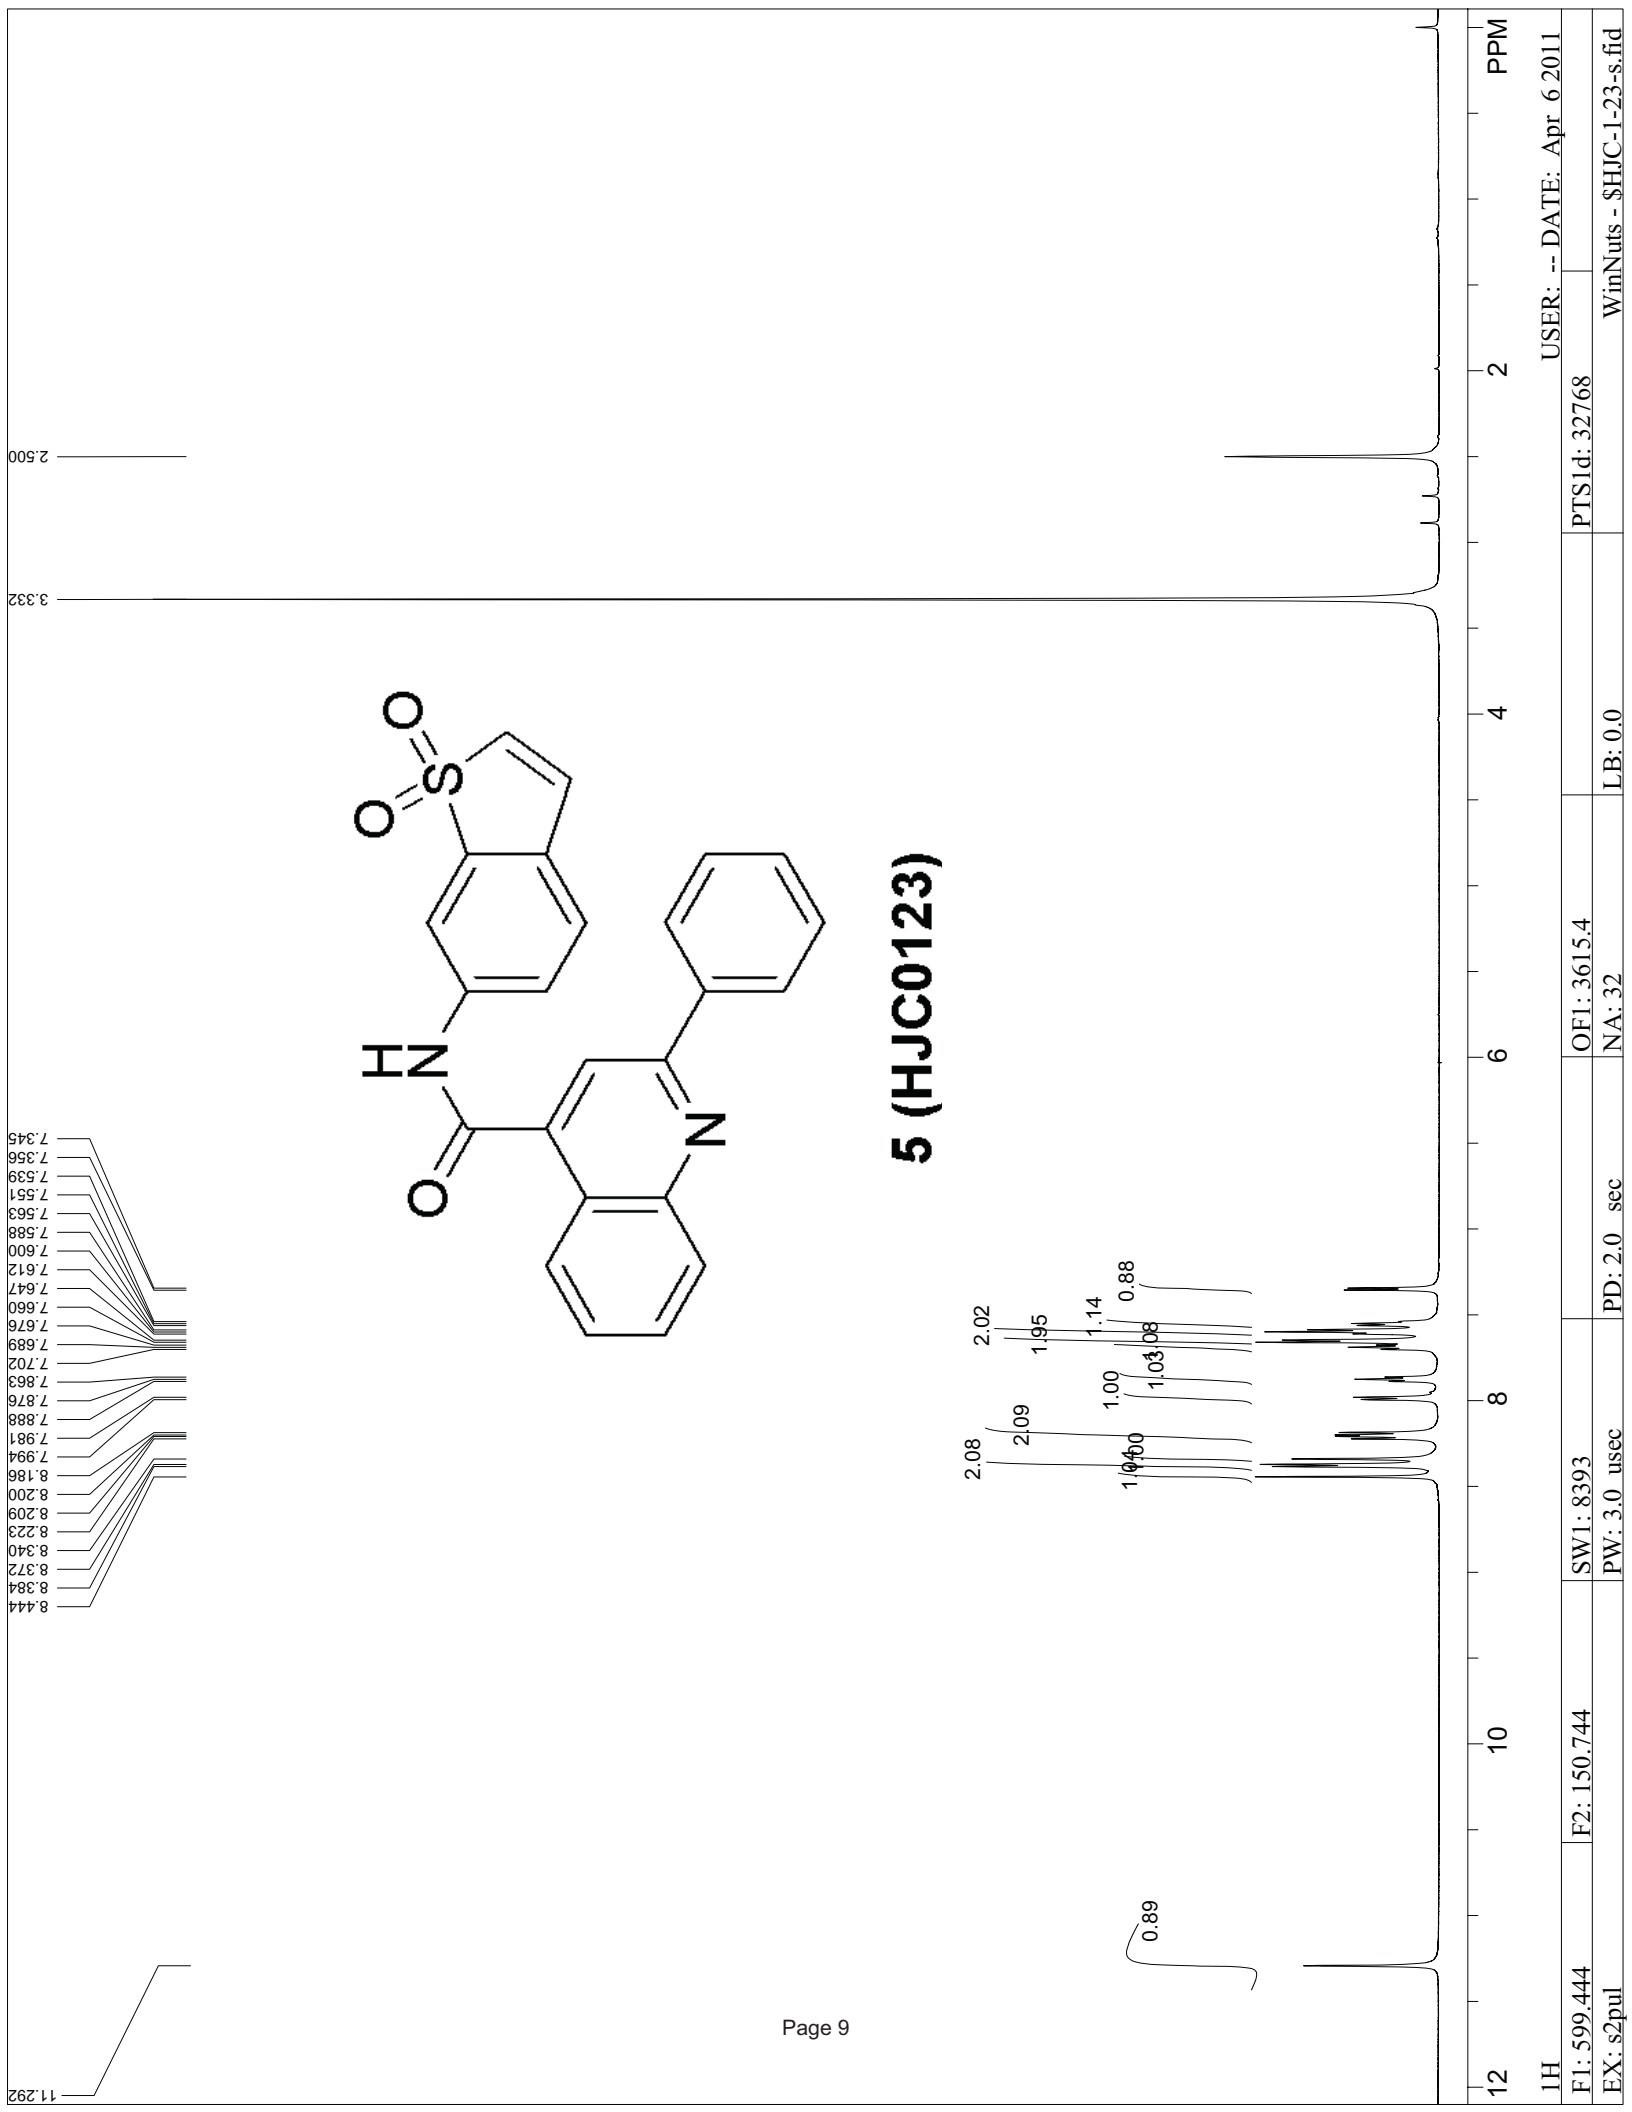

USER: -- DATE: Apr 6 2011

PTS1d: 32768

WinNuts - \$HJC-1-23-s.fid

OF1: 3615.4

LB: 0.0

SW1: 8393

PW: 3.0 usec

F2: 150.744

EX: s2pul

PD: 2.0 sec



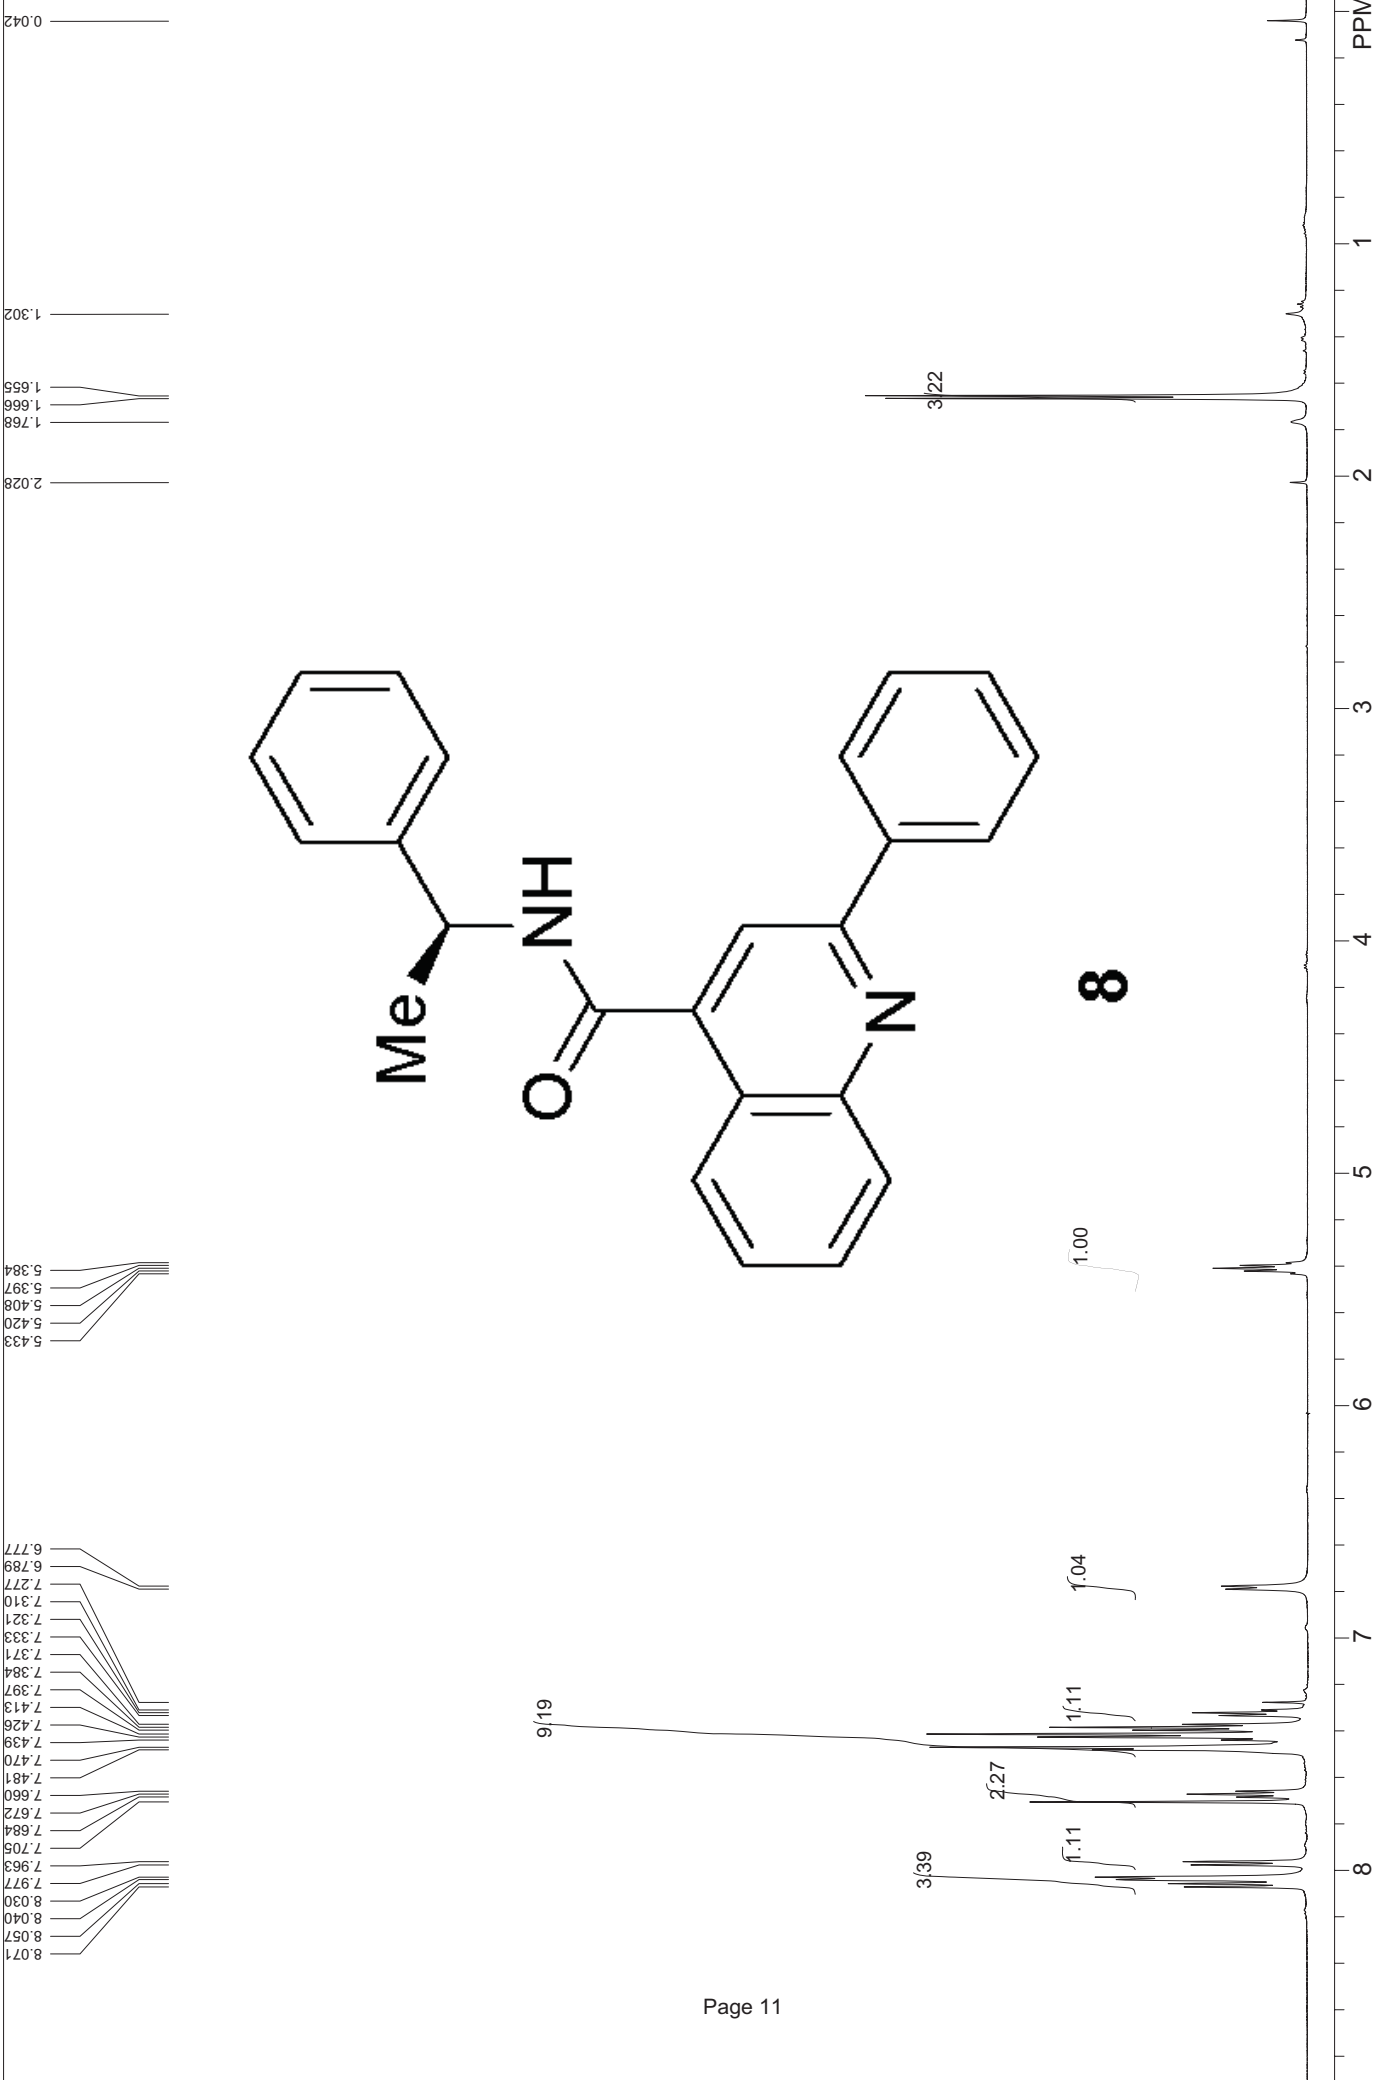

1H  
 F1: 599.441 F2: 150.743 SW1: 8393 OF1: 3616.8  
 EX: s2pul PW: 3.0 usec PD: 2.0 sec NA: 32 LB: 0.0  
 USER: -- DATE: Apr 12 2011  
 PTSId: 32768  
 WinNuts - \$HJC-1-28.fid



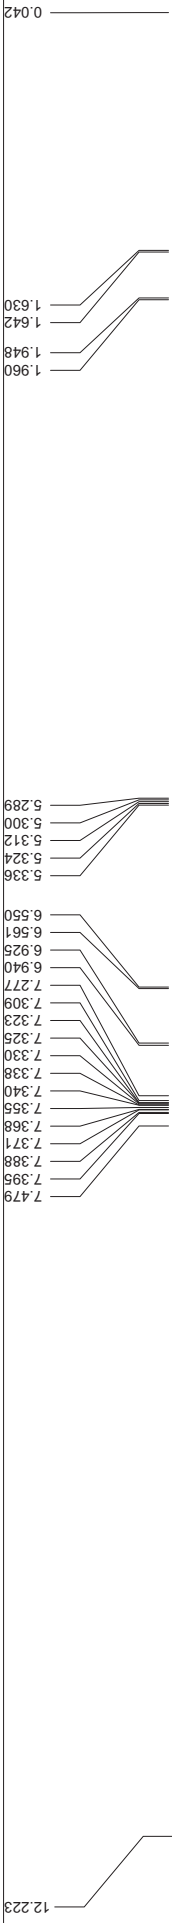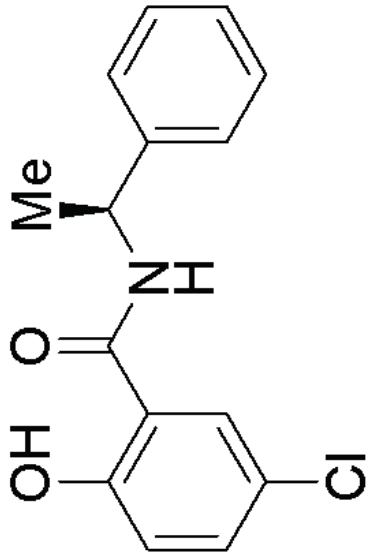

9

|             |                            |
|-------------|----------------------------|
| 1H          | USER: -- DATE: Apr 12 2011 |
| F1: 599.441 | PTSId: 32768               |
| F2: 150.743 | OF1: 3616.8                |
| EX: s2pul   | NA: 32                     |
|             | PD: 2.0 sec                |
|             | LB: 0.0                    |
|             | WinNuts - \$HJC-1-30.fid   |

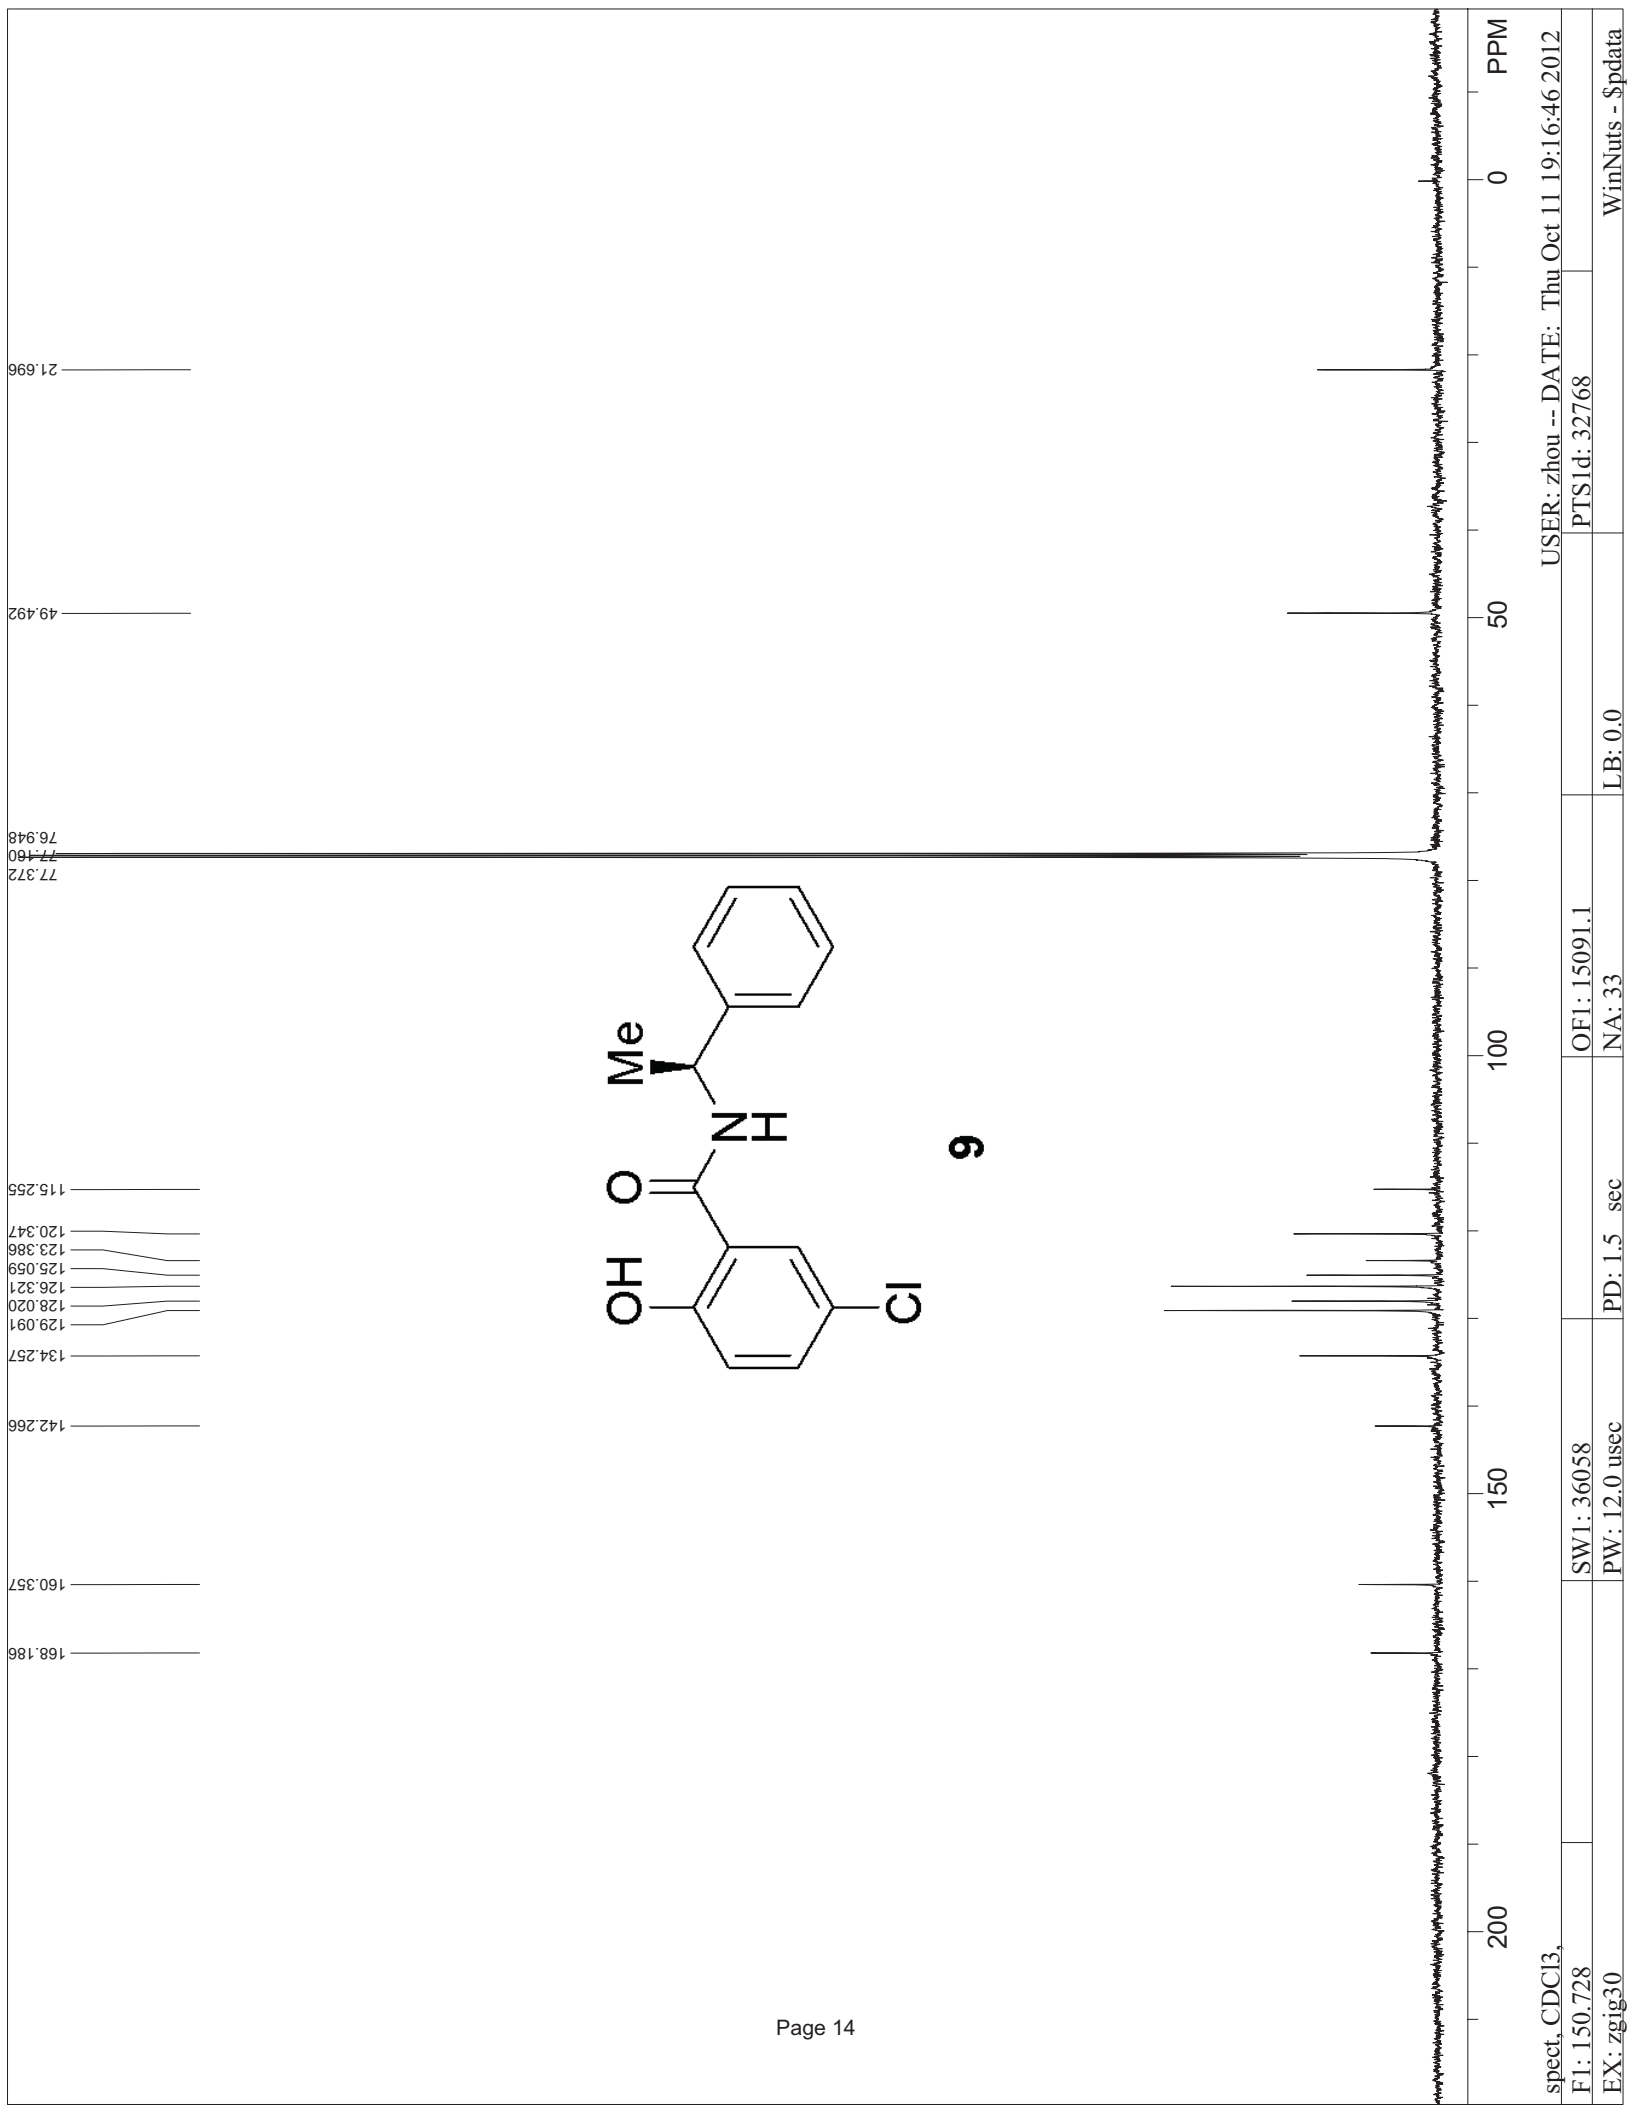

spect, CDCI3, USER: zhou -- DATE: Thu Oct 11 19:16:46 2012  
 F1: 150.728 PTSId: 32768  
 EX: zgig30 LB: 0.0 OF1: 15091.1 NA: 33  
 PD: 1.5 sec SW1: 36058 PW: 12.0 usec  
 WinNuts - \$pdata

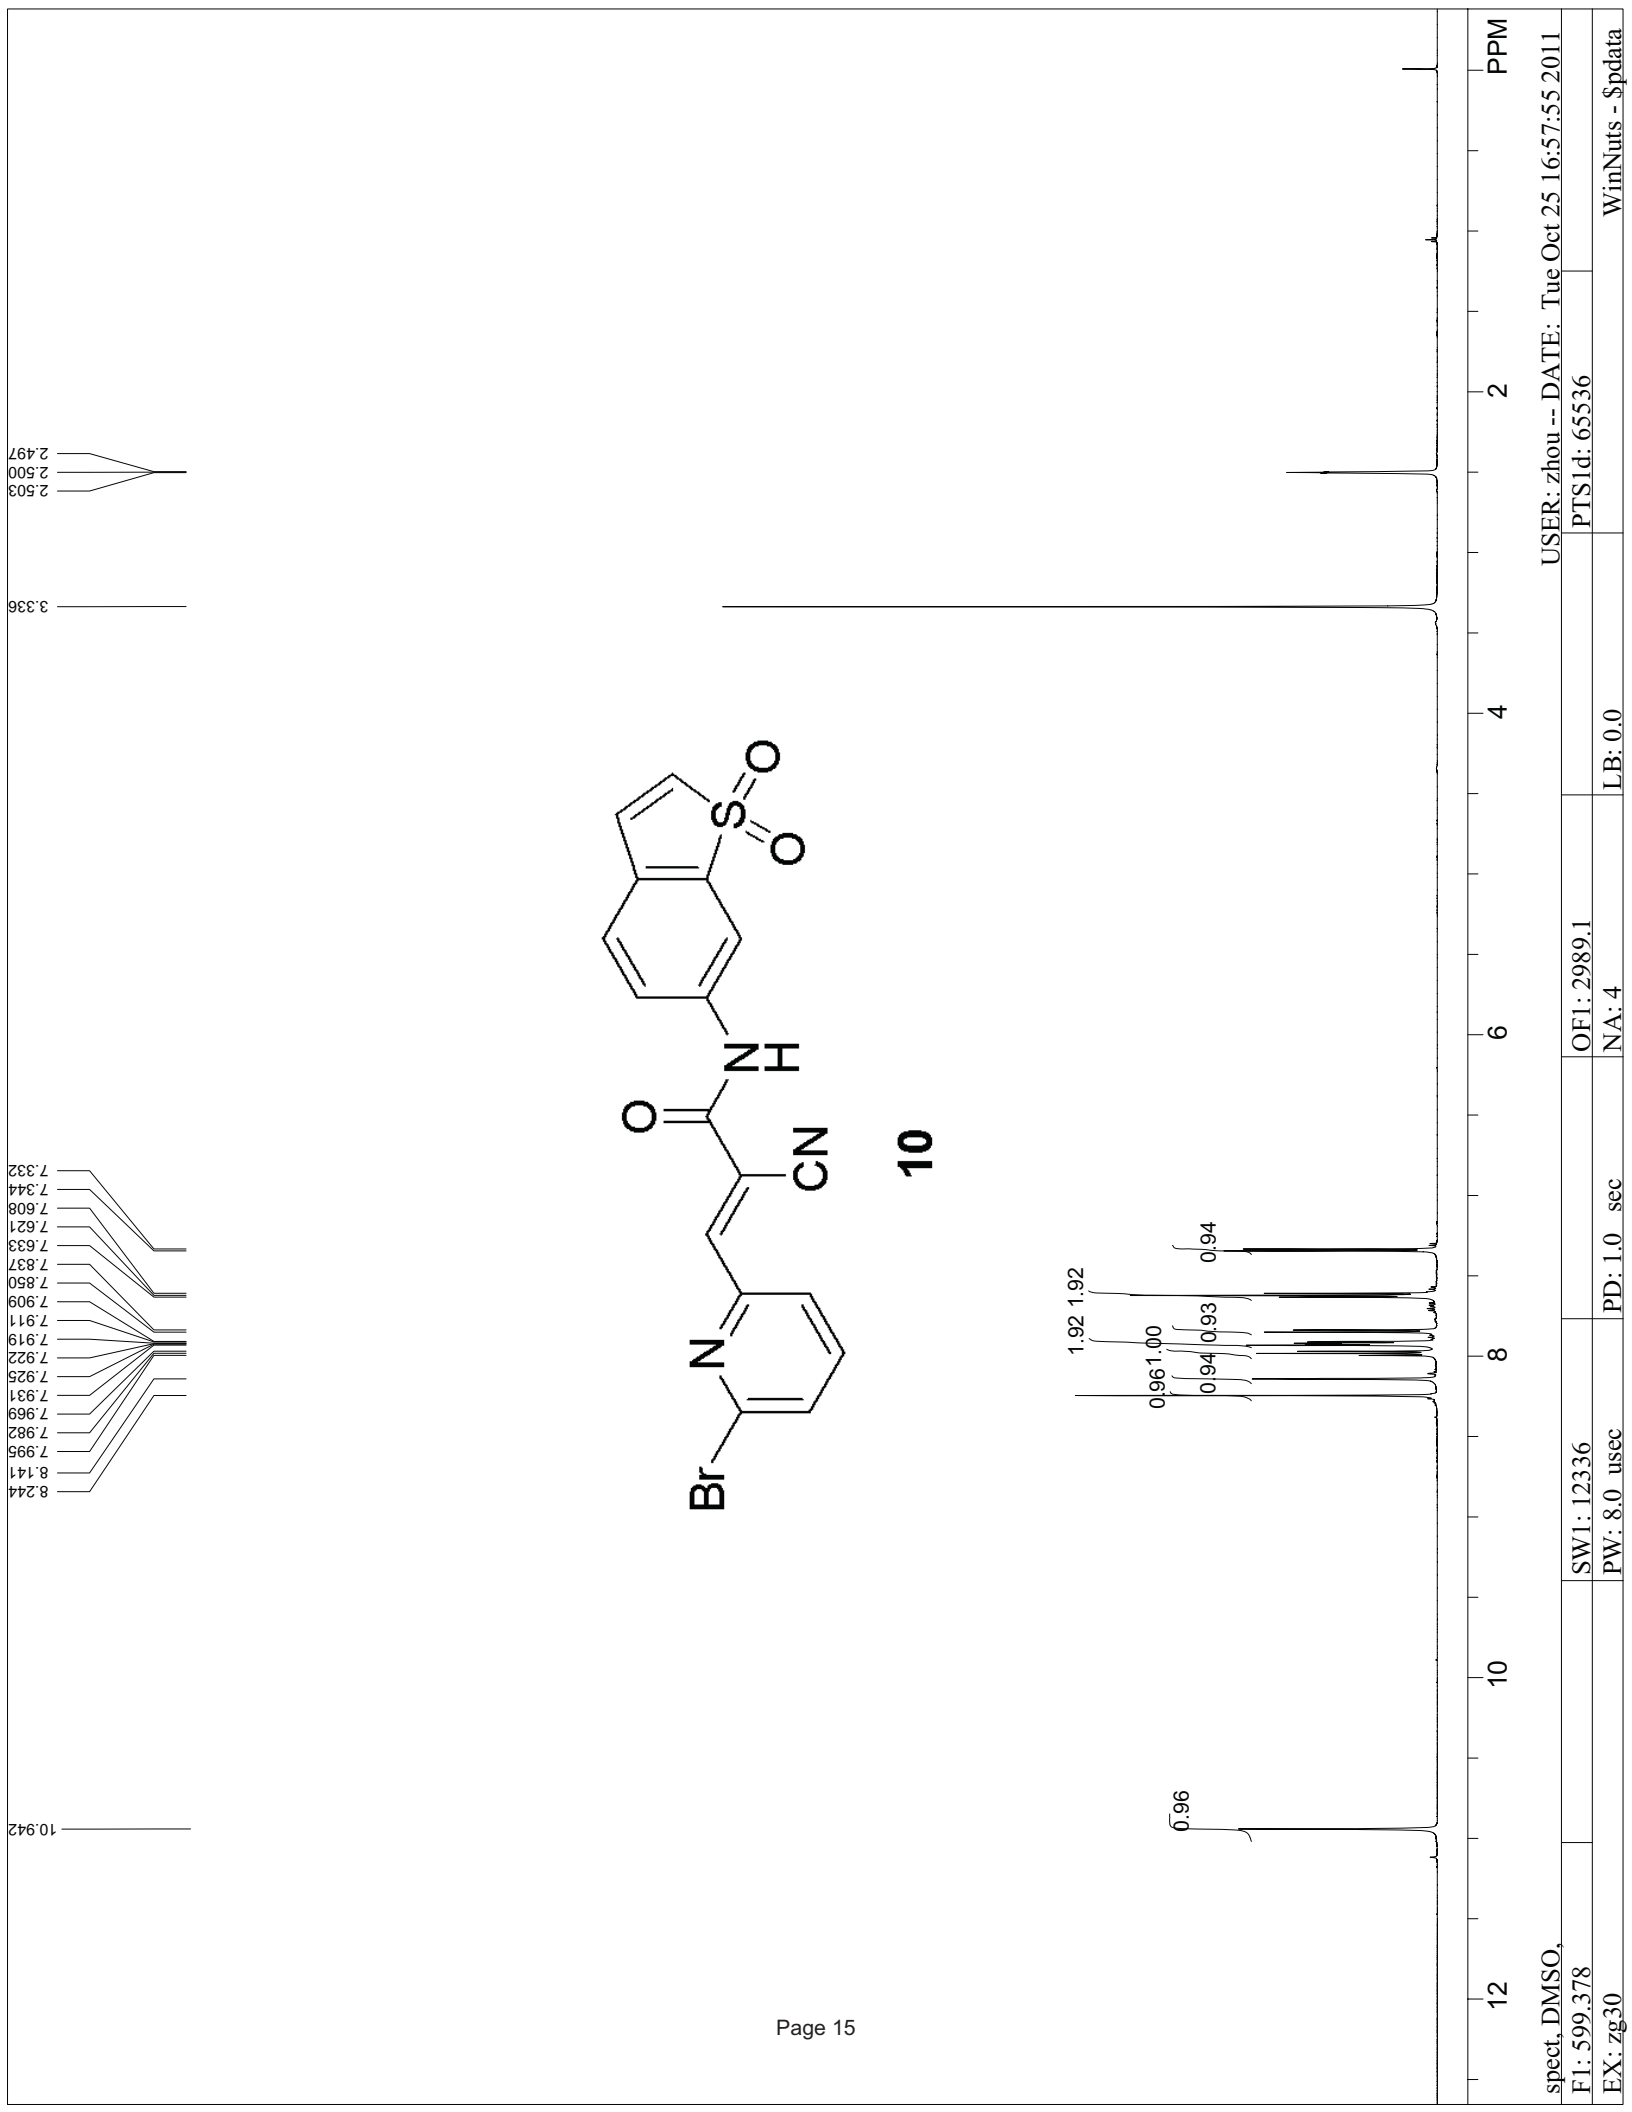

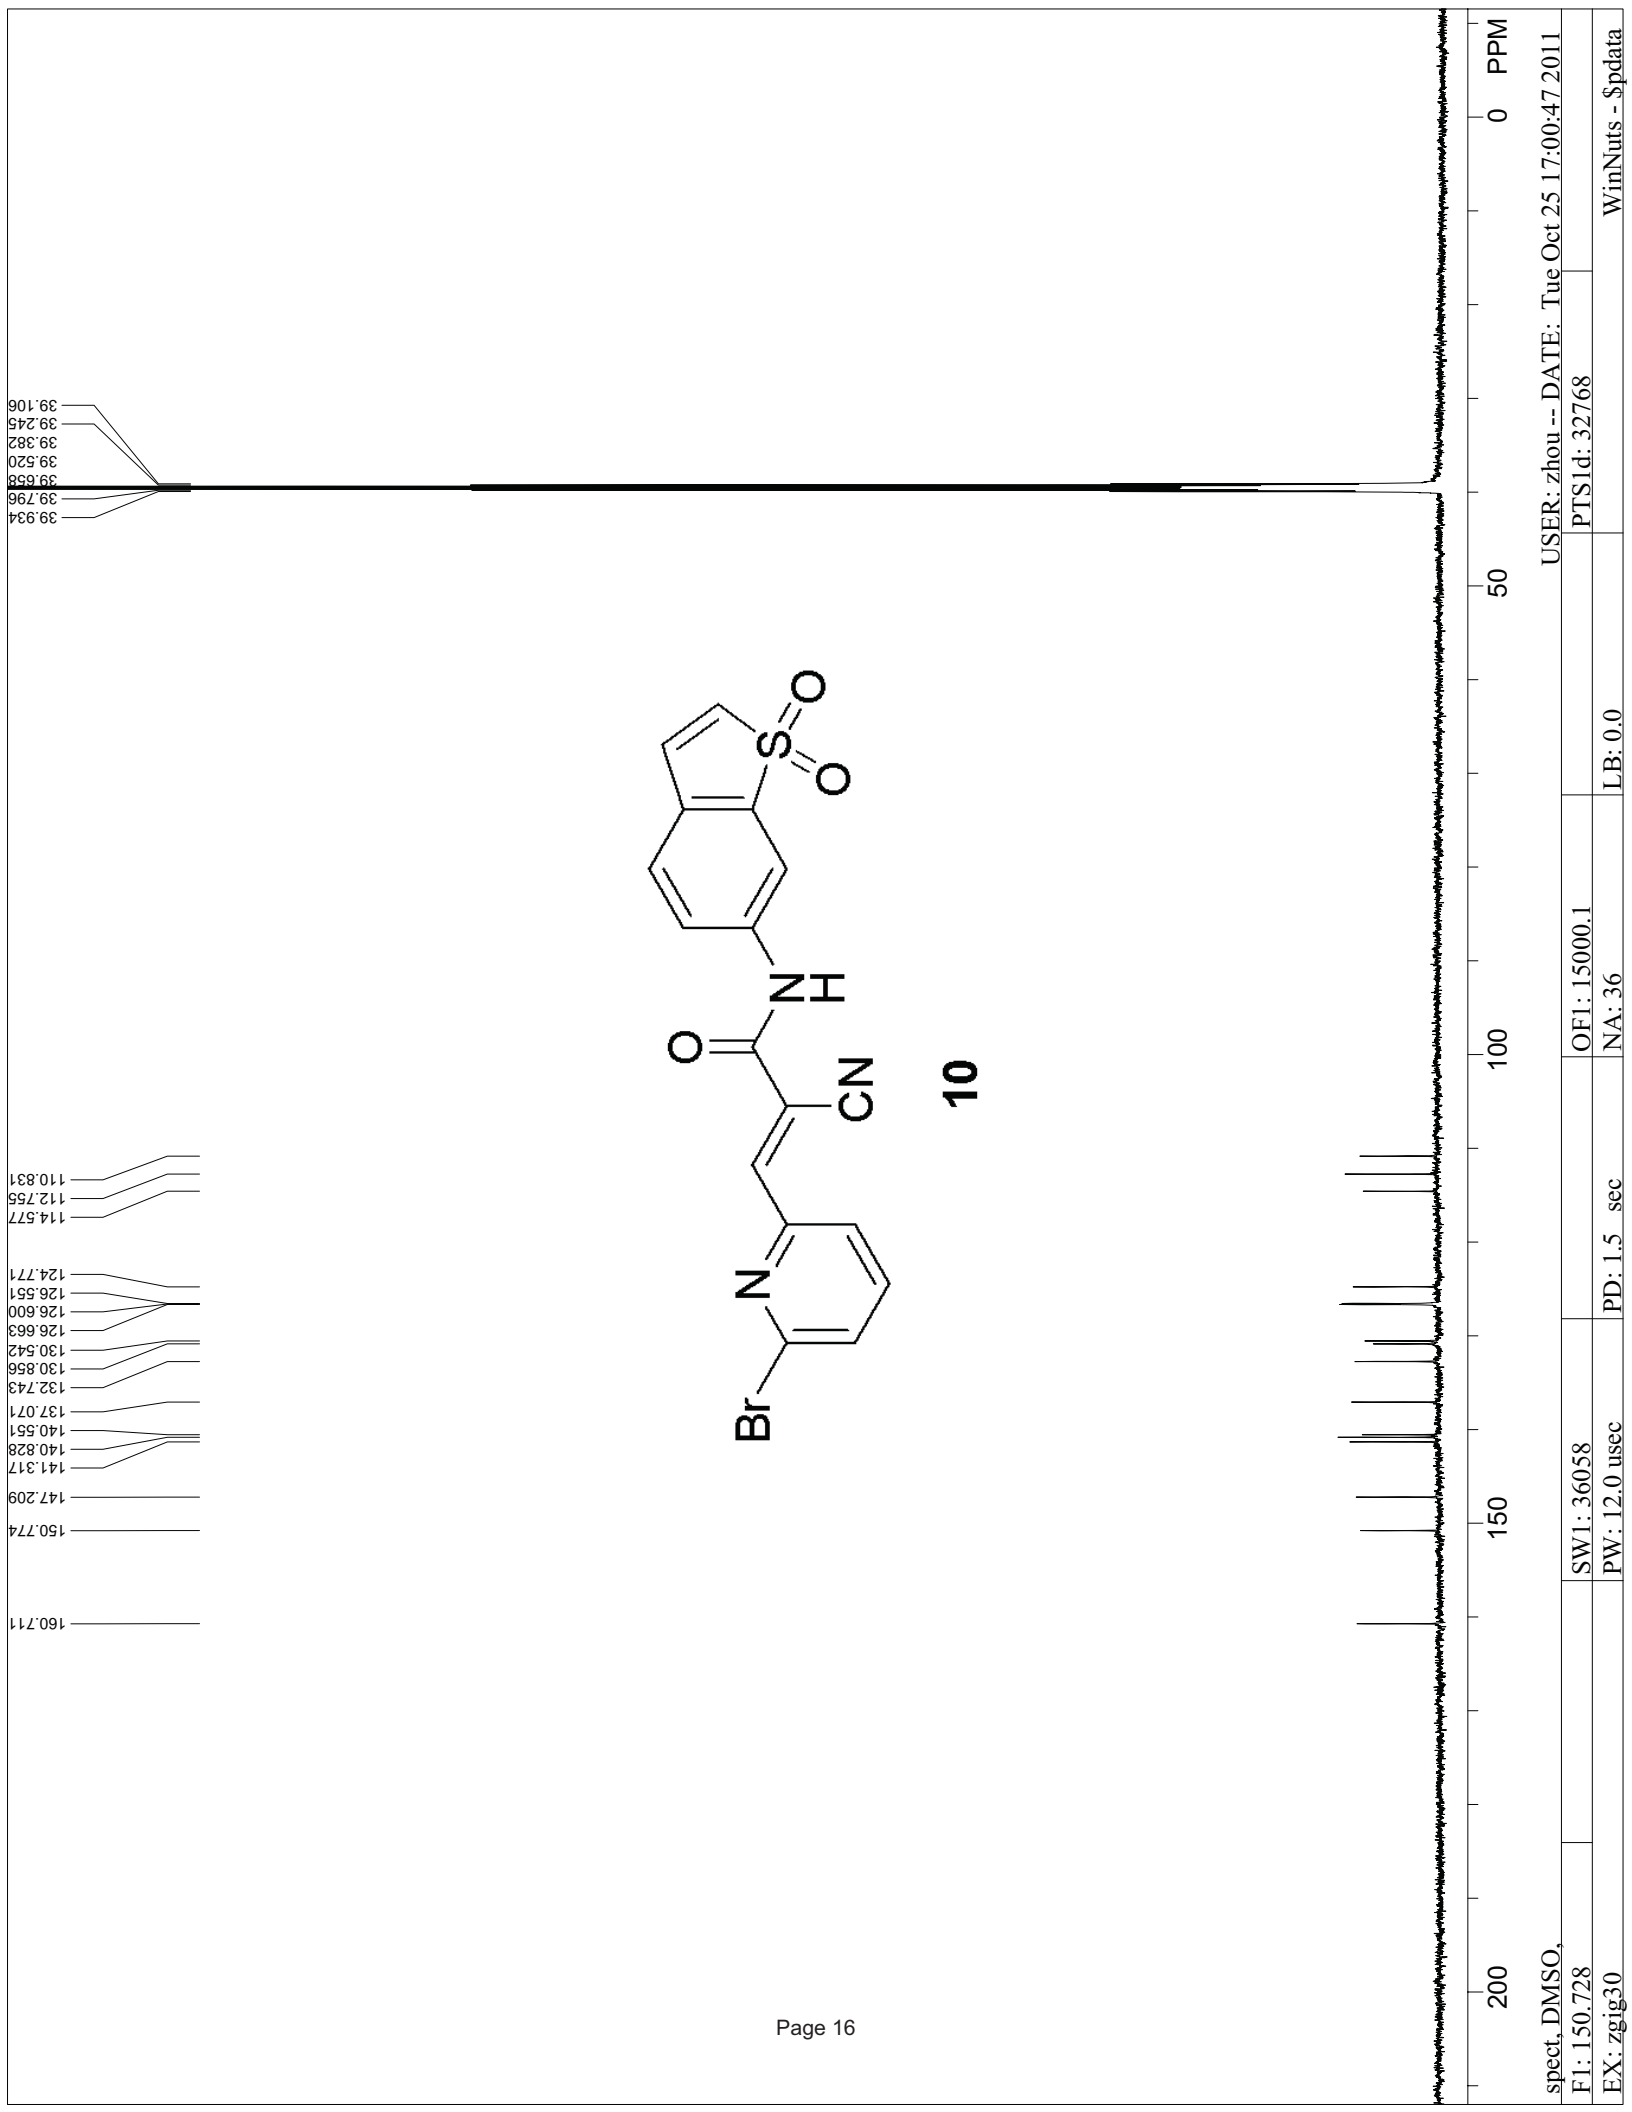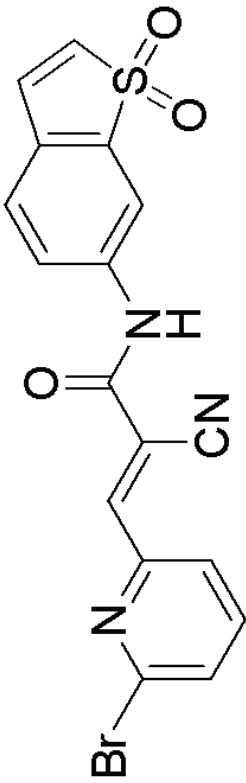

10

39.934  
39.796  
39.658  
39.520  
39.382  
39.245  
39.106

160.711  
150.774  
147.209  
141.317  
140.828  
140.551  
137.071  
132.743  
130.856  
130.542  
126.663  
126.600  
126.551  
124.771  
114.577  
112.755  
110.831



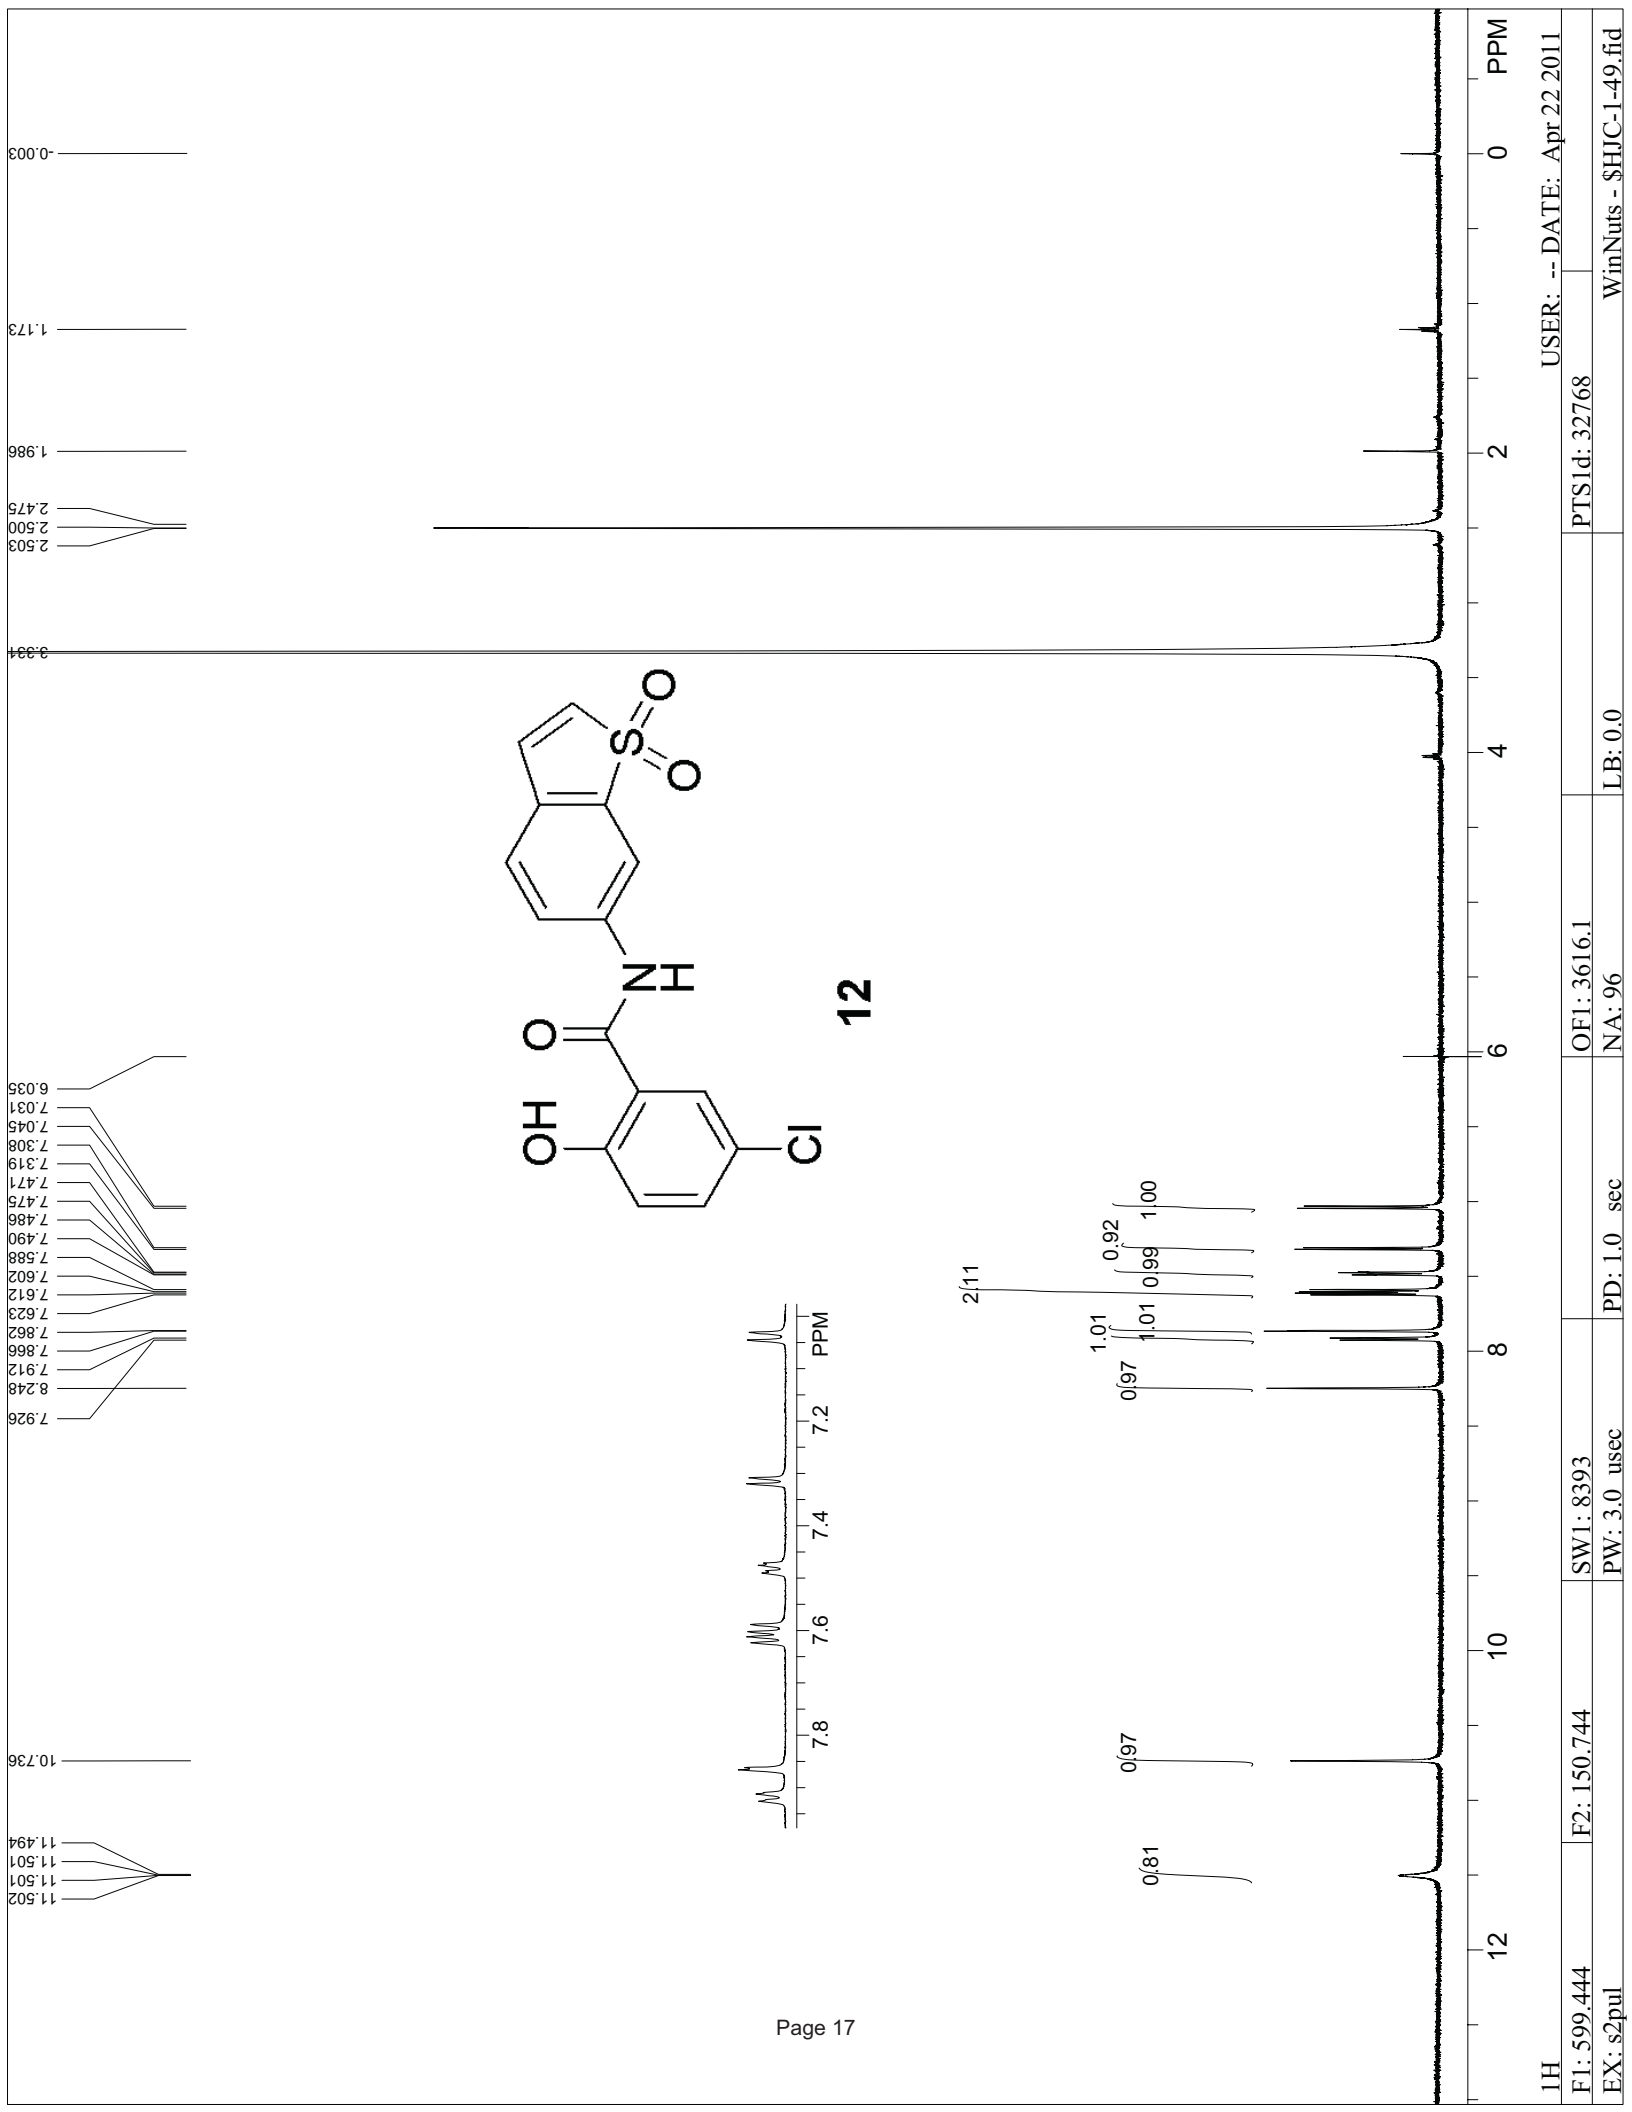

1H

F1: 599.444  
EX: s2pul

F2: 150.744

SW1: 8393  
PW: 3.0 usec

PD: 1.0 sec

OF1: 3616.1  
NA: 96

LB: 0.0

PTS1d: 32768

WinNuts - SHIC-1-49.fid  
USER: -- DATE: Apr 22 2011



000.0

6.987  
7.002  
7.203  
7.218  
7.260  
7.479  
7.484  
7.494  
7.498  
7.534  
7.538  
7.548  
7.552  
8.021  
8.025  
8.124  
8.128

10.106

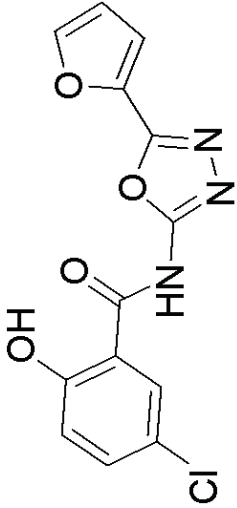

13

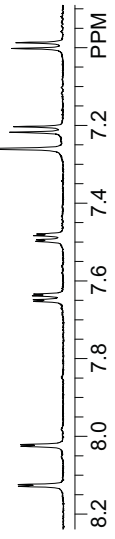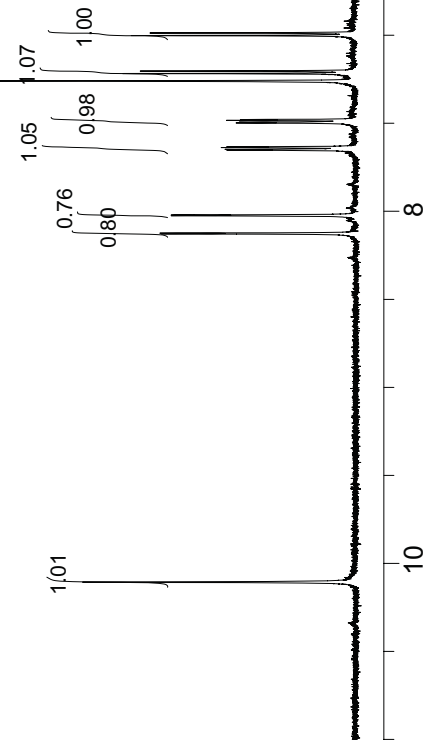

|             |              |             |              |                            |
|-------------|--------------|-------------|--------------|----------------------------|
| 1Hjexp10    | SW1: 8393    | OF1: 3606.4 | PTS1d: 32768 | USER: -- DATE: Apr 25 2011 |
| F1: 599.441 | F2: 150.743  | NA: 64      | LB: 0.0      | WinNuts - \$HIC-1-51.fid   |
| EX: s2pul   | PW: 3.0 usec | PD: 1.0 sec |              |                            |

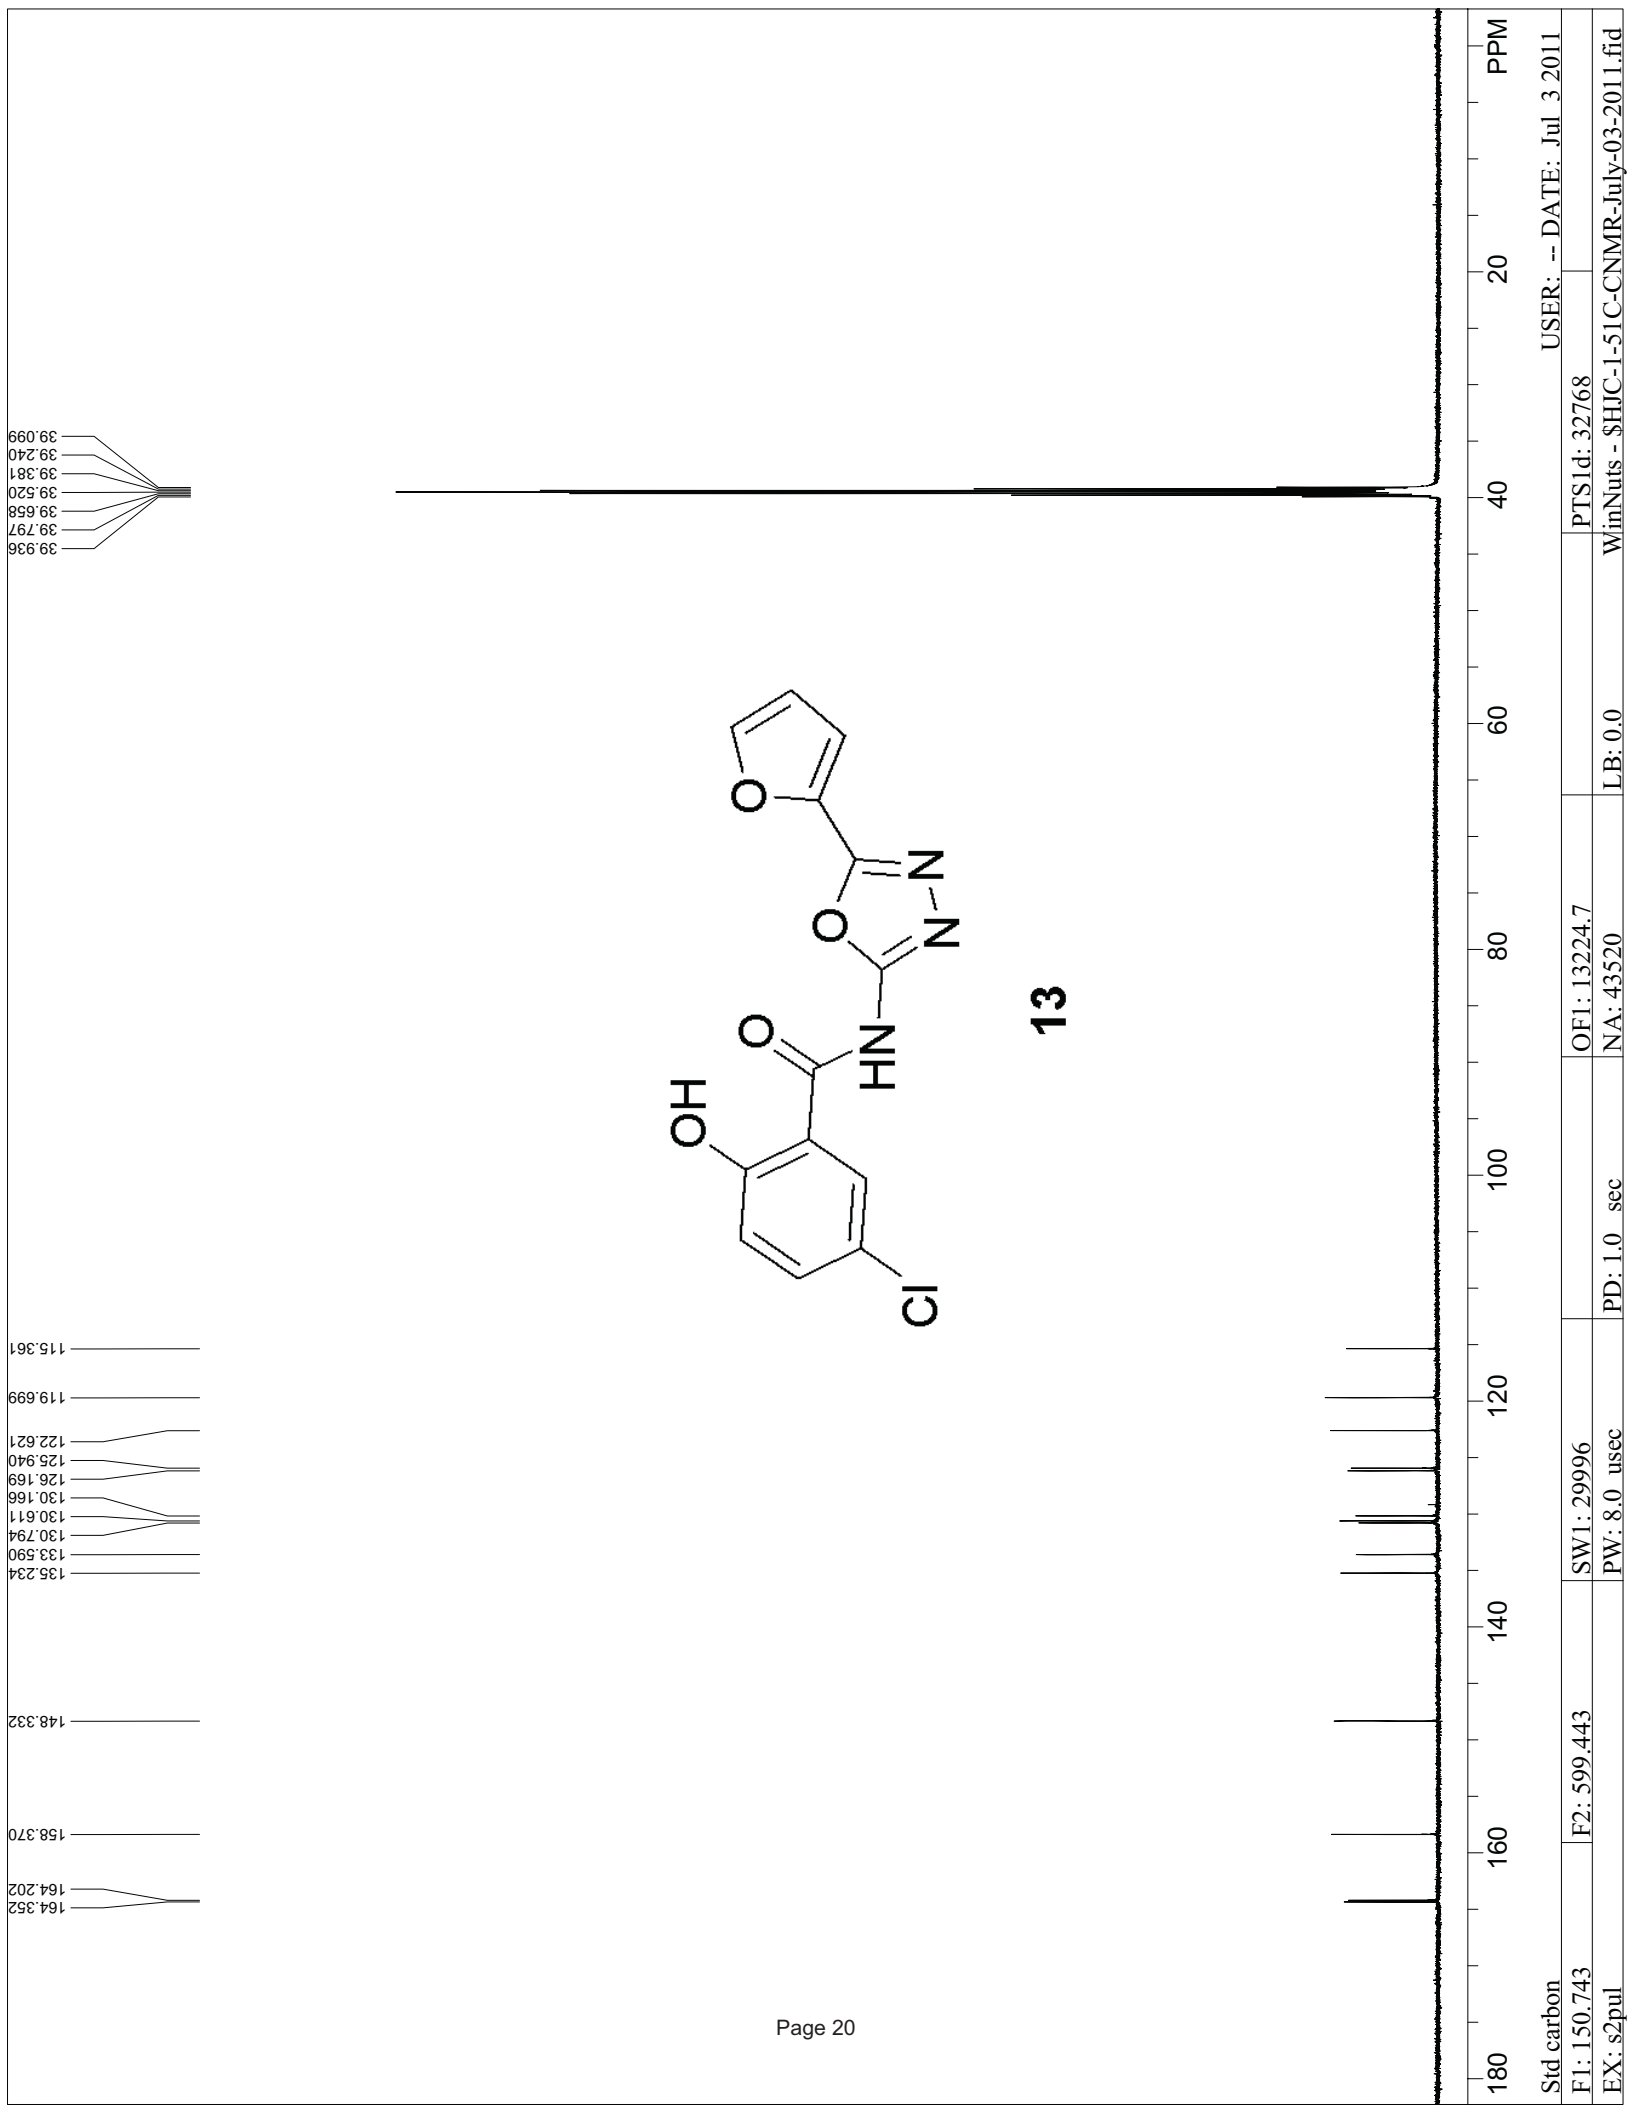

USER: -- DATE: Jul 3 2011

PTSId: 32768

WinNuts - \$HJC-1-51C-CNMR-July-03-2011.fid

LB: 0.0

OFI: 13224.7

NA: 43520

PD: 1.0 sec

SW1: 29996

PW: 8.0 usec

F2: 599.443

Std carbon

F1: 150.743

EX: s2pul

13

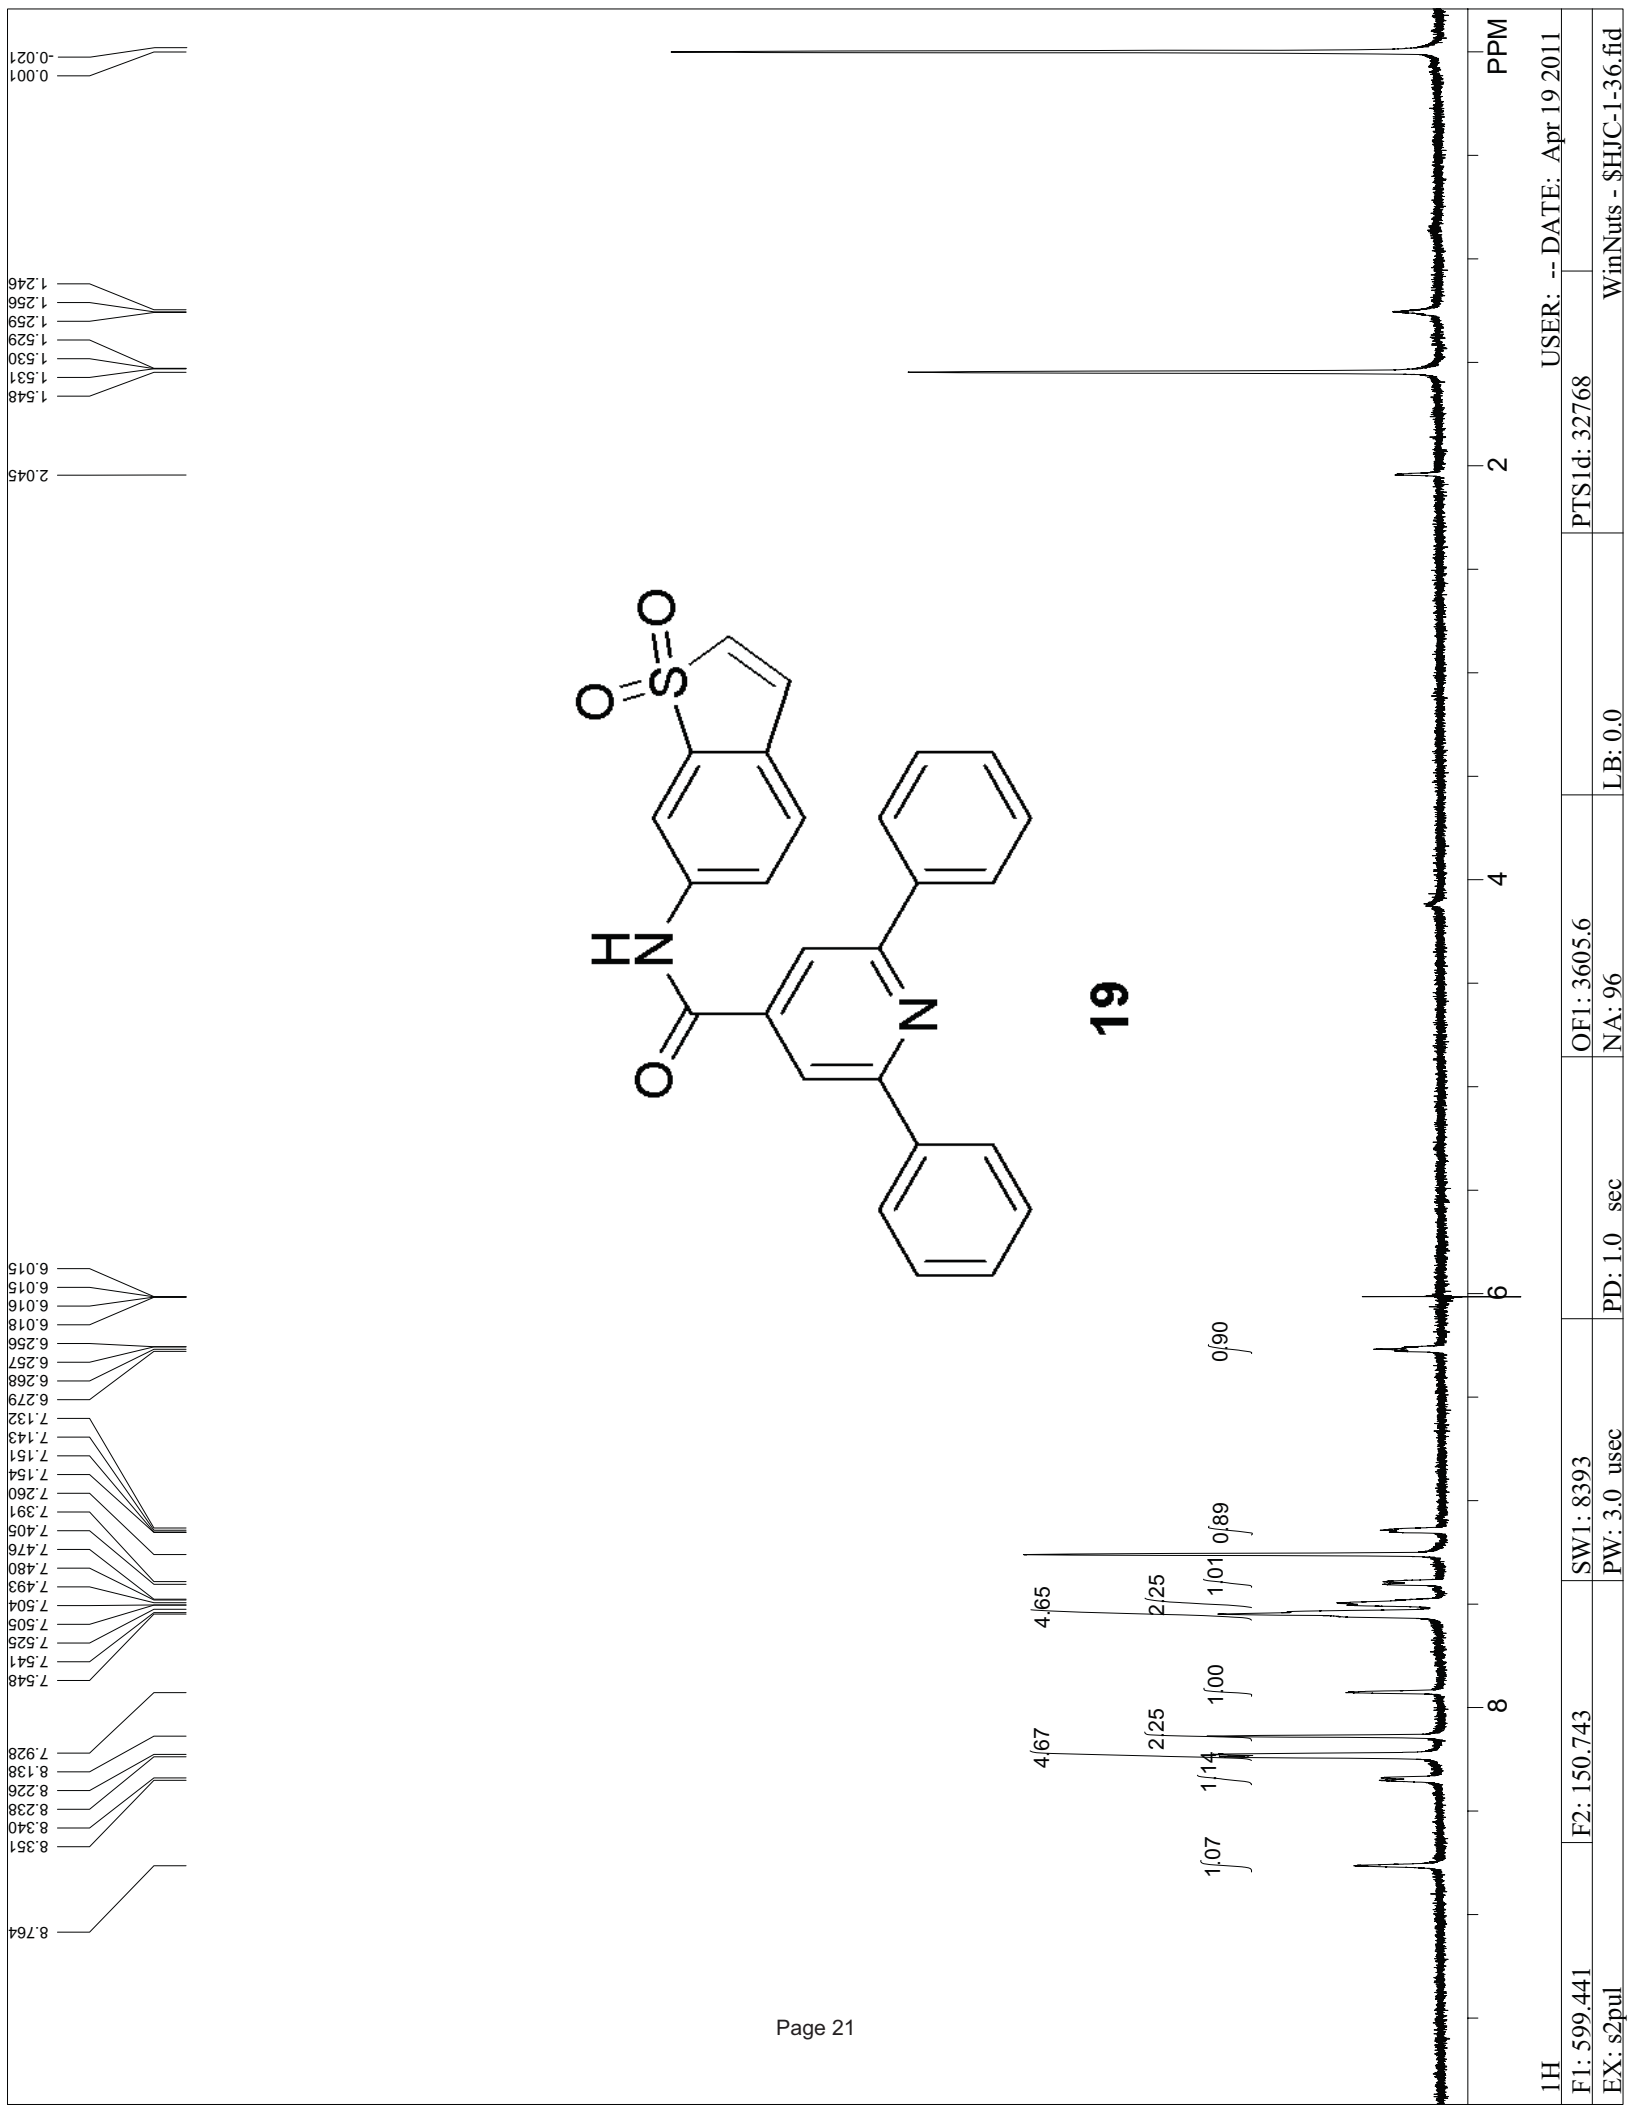

1H

F1: 599.441

F2: 150.743

SW1: 8393

OF1: 3605.6

NA: 96

LB: 0.0

PTS1d: 32768

USER: -- DATE: Apr 19 2011

WinNuts - \$HIC-1-36.fid



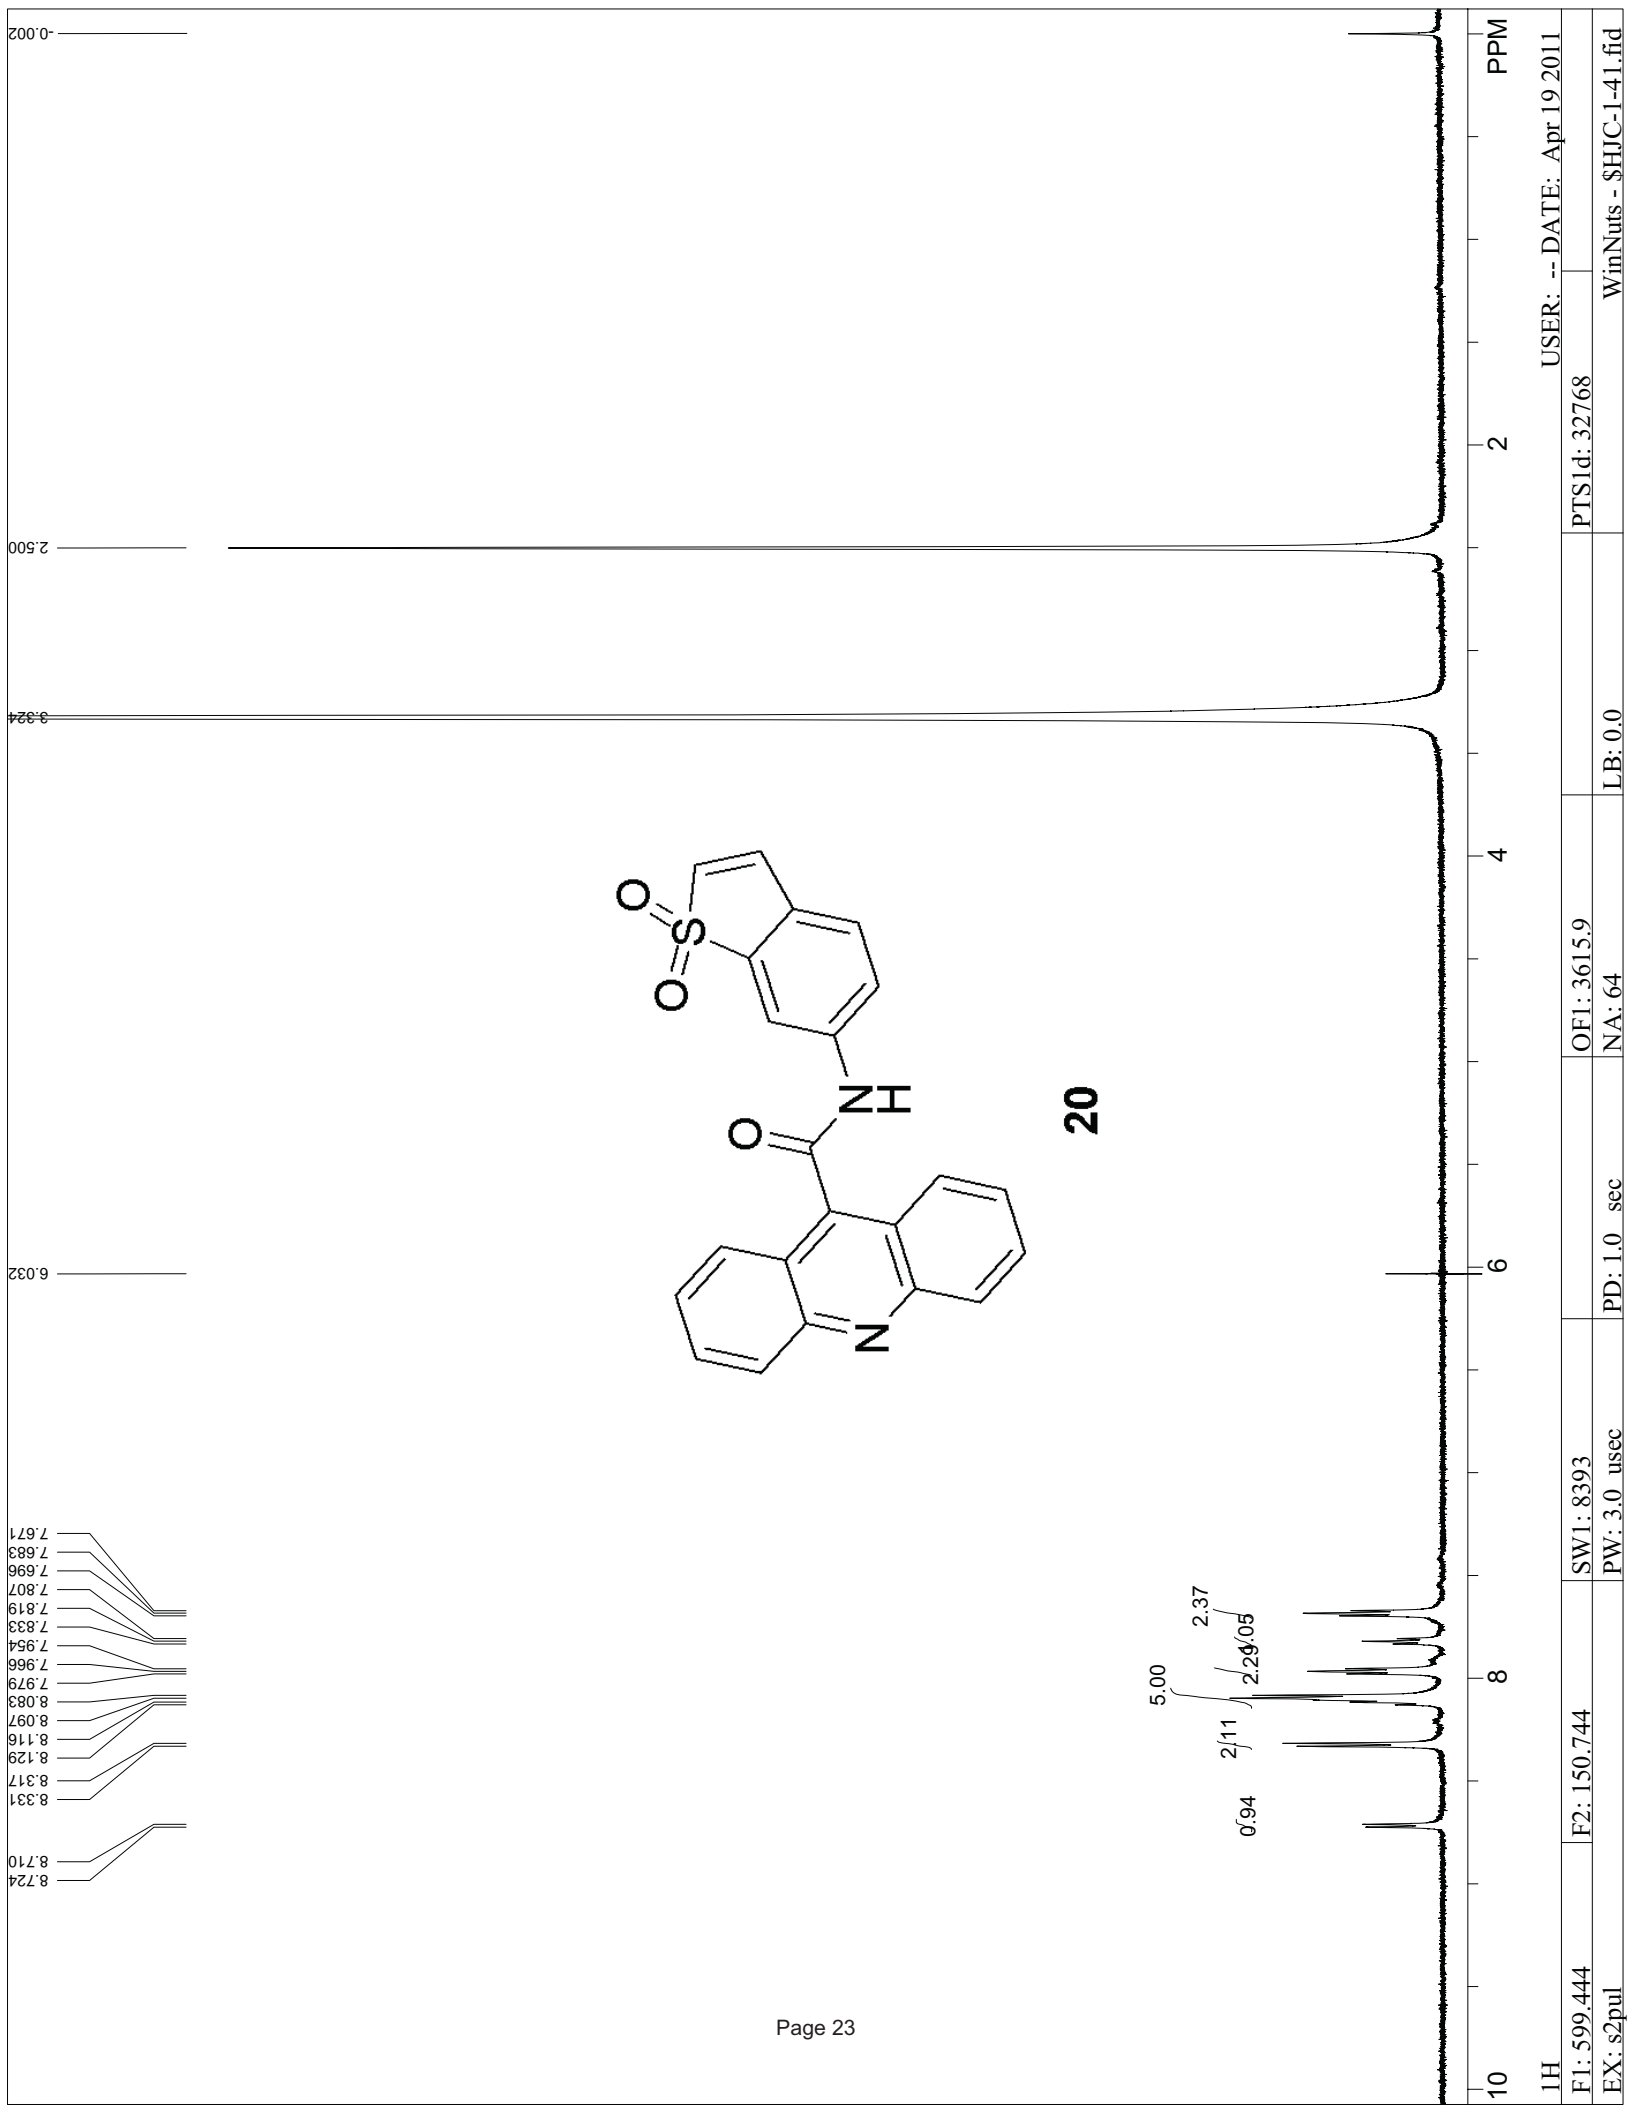

8.724  
8.710  
8.331  
8.317  
8.129  
8.116  
8.097  
8.083  
7.979  
7.966  
7.954  
7.833  
7.819  
7.807  
7.696  
7.683  
7.671

5.00  
2.37  
2.29  
0.05  
2/11  
0.94

|             |                            |              |             |              |                          |
|-------------|----------------------------|--------------|-------------|--------------|--------------------------|
| 10          | 2                          | 4            | 6           | 8            | 10                       |
| PPM         |                            |              |             |              |                          |
| 1H          | USER: -- DATE: Apr 19 2011 | PTS1d: 32768 | OF1: 3615.9 | SW1: 8393    | F2: 150.744              |
| F1: 599.444 |                            |              | NA: 64      | PW: 3.0 usec | PD: 1.0 sec              |
| EX: s2pul   |                            | LB: 0.0      |             |              |                          |
|             |                            |              |             |              | WinNuts - \$HIC-1-41.fid |





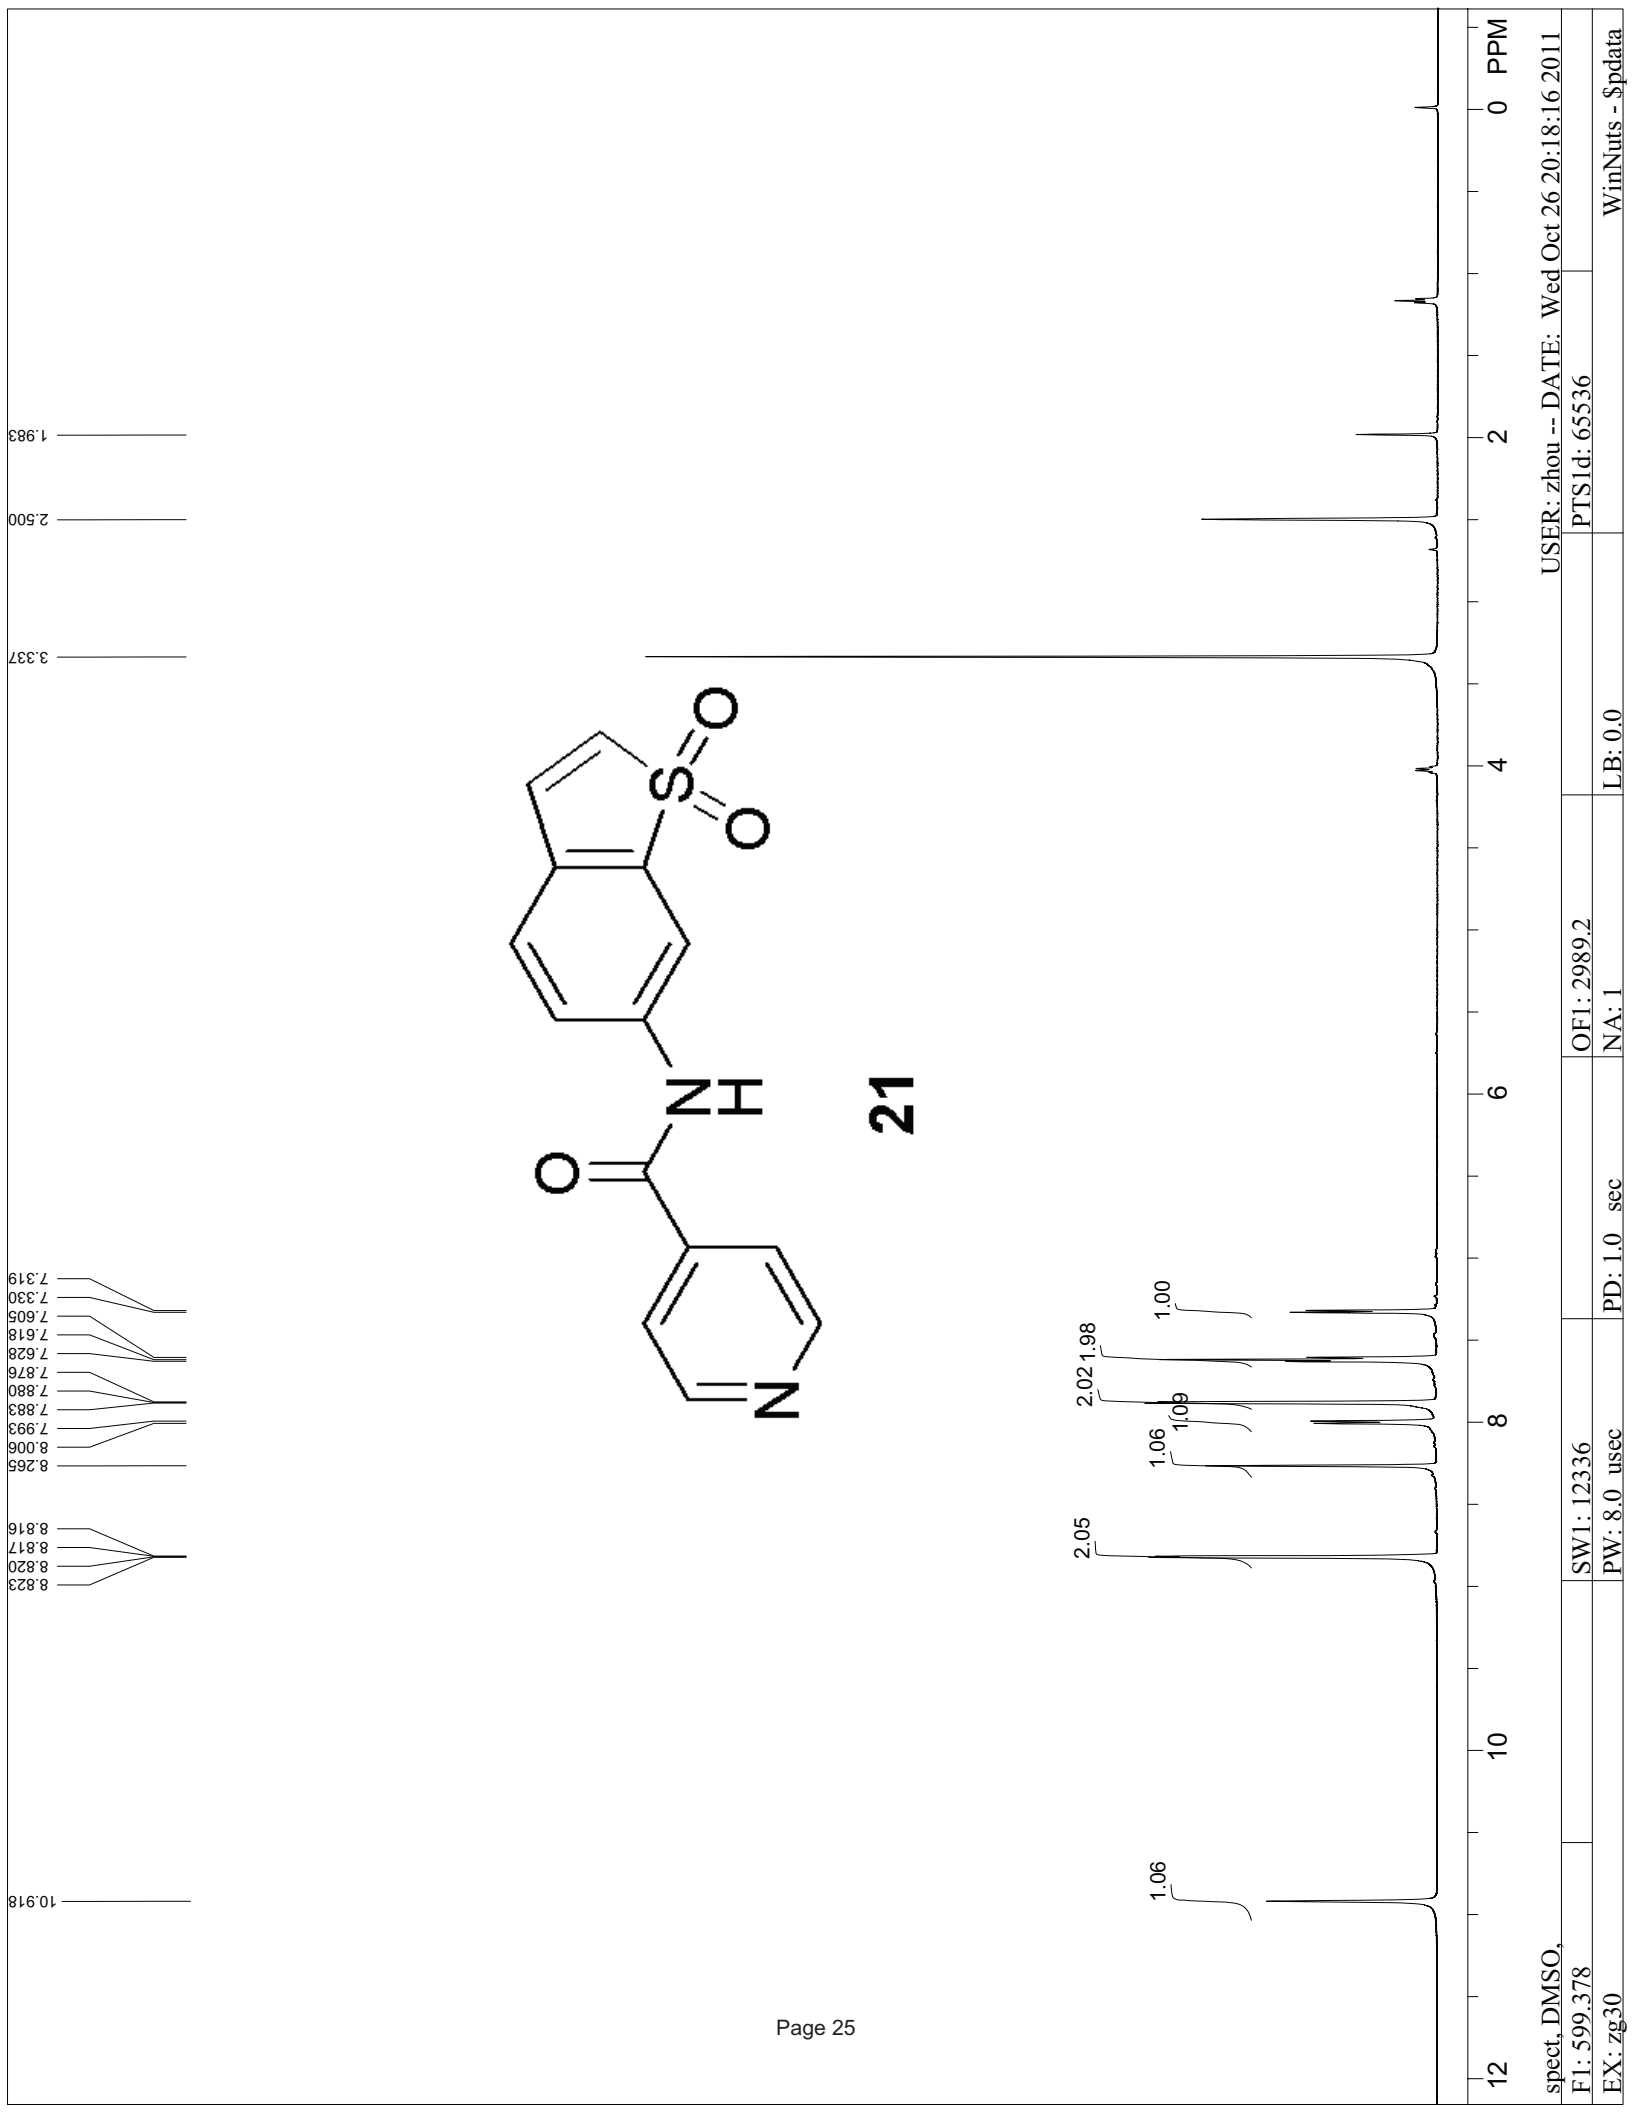

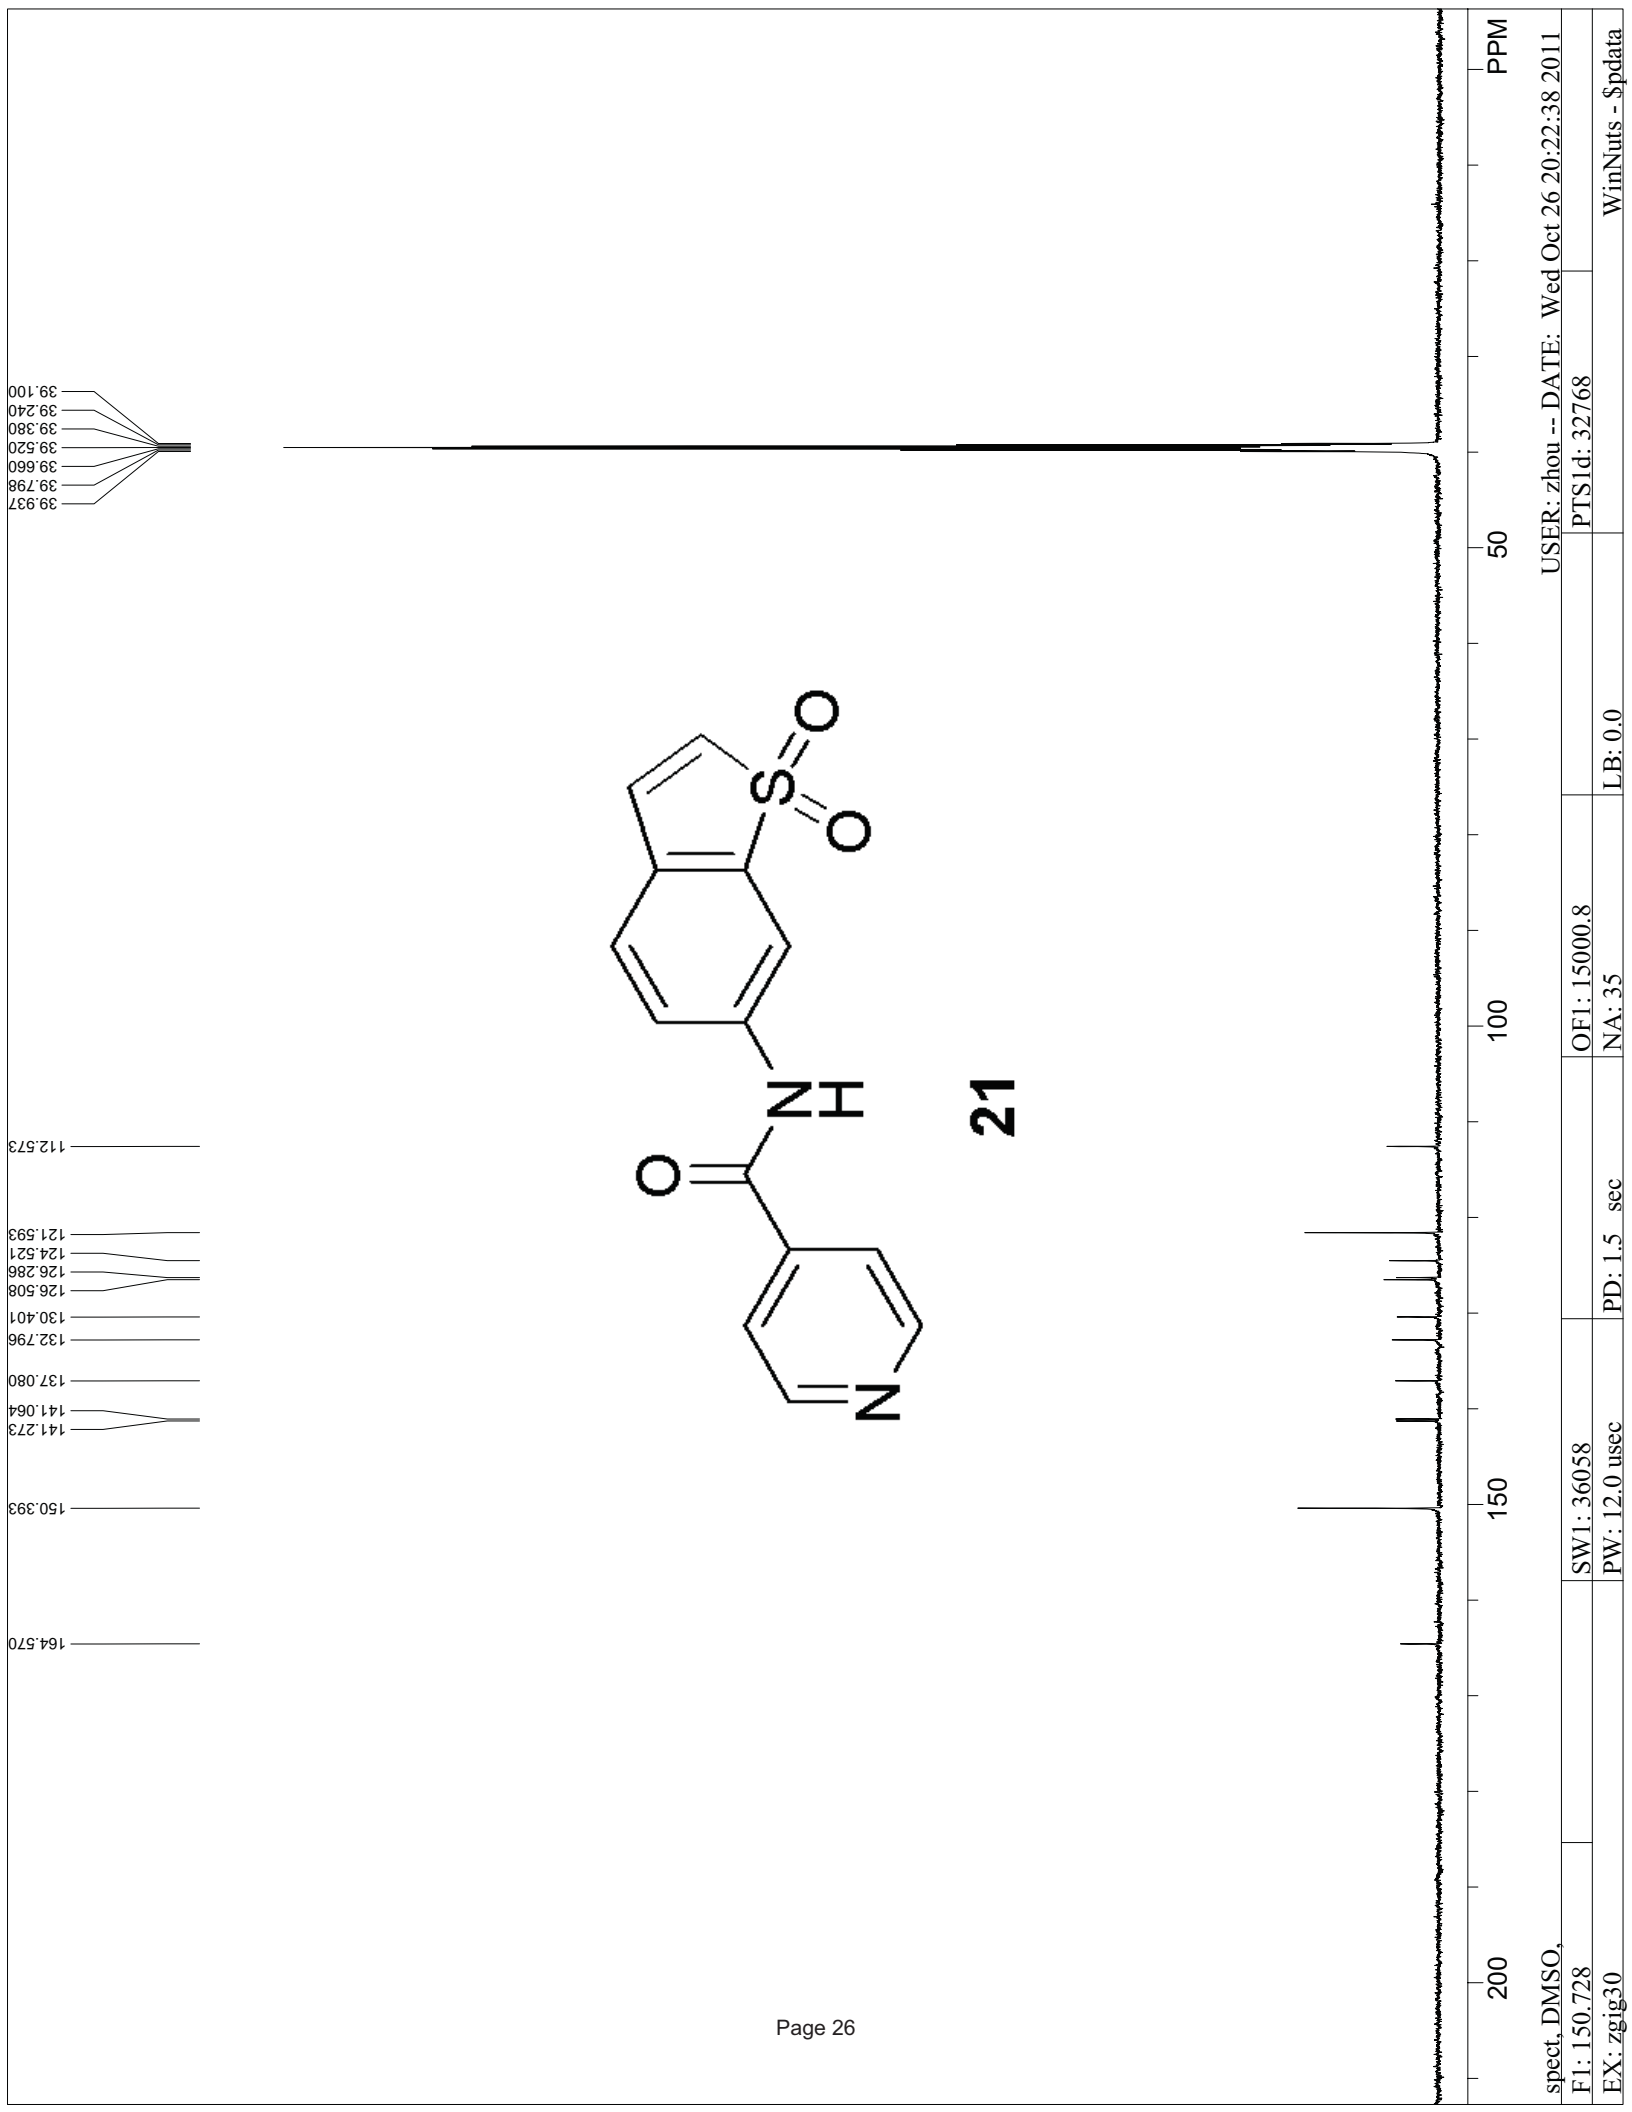

spect, DMSO, F1: 150.728 EX: zgig30 SW1: 36058 PW: 12.0 usec PD: 1.5 sec OF1: 15000.8 NA: 35 LB: 0.0 PTS1d: 32768 WinNuts - \$pdata

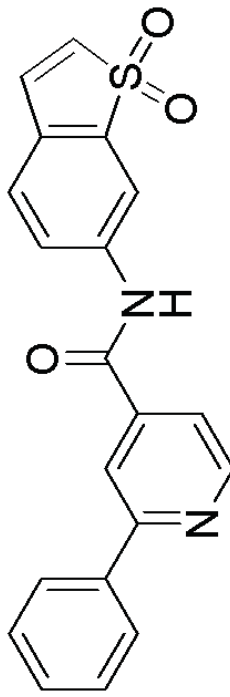

22

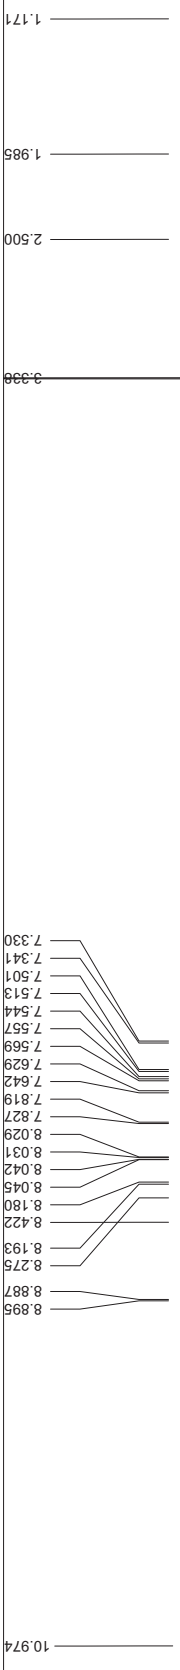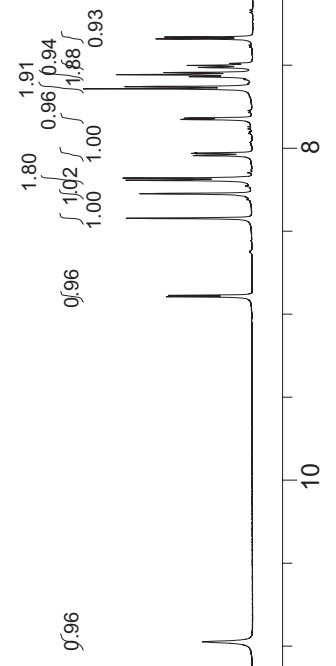

|              |                                              |
|--------------|----------------------------------------------|
| spect, DMSO, | USER: zhou -- DATE: Thu Dec 08 22:45:38 2011 |
| F1: 599.378  | PTSId: 65536                                 |
| EX: zg30     | WinNuts - Spdata                             |
| SW1: 12336   | OF1: 2989.0                                  |
| PW: 8.0 usec | NA: 4                                        |
| PD: 1.0 sec  | LB: 0.0                                      |

164.639  
 156.883  
 150.426  
 142.579  
 141.099  
 138.086  
 137.117  
 132.824  
 130.425  
 129.601  
 128.915  
 126.784  
 126.549  
 126.314  
 124.565  
 120.477  
 117.994  
 112.677

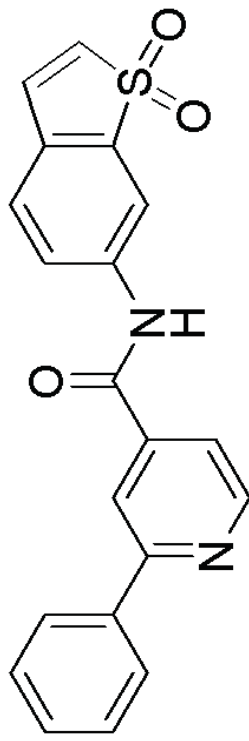

22

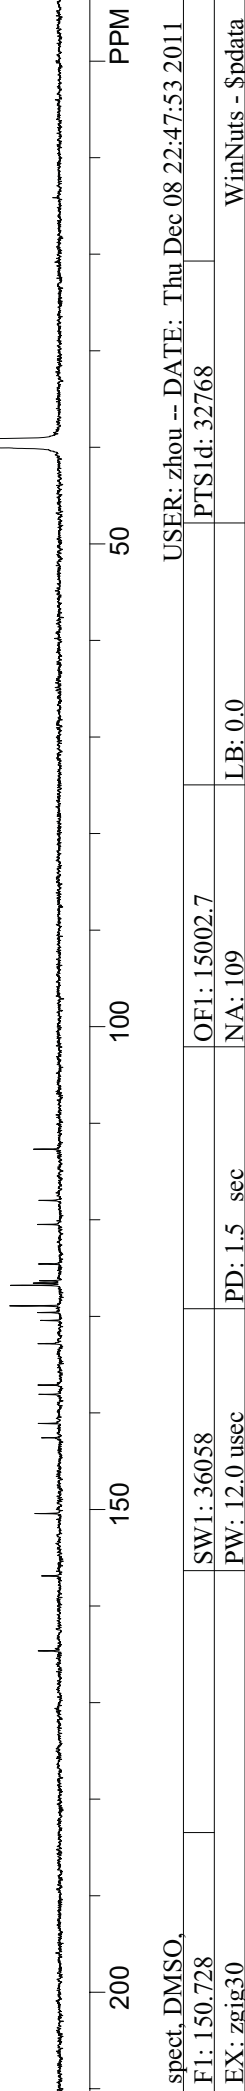

39.936  
 39.797  
 39.658  
 39.529  
 39.382  
 39.244  
 39.106

spect, DMSO,  
 F1: 150.728  
 EX: zgig30  
 SW1: 36058  
 PW: 12.0 usec  
 OF1: 15002.7  
 NA: 109  
 LB: 0.0  
 PTS1d: 32768  
 USER: zhou -- DATE: Thu Dec 08 22:47:53 2011  
 WinNuts - \$pdata

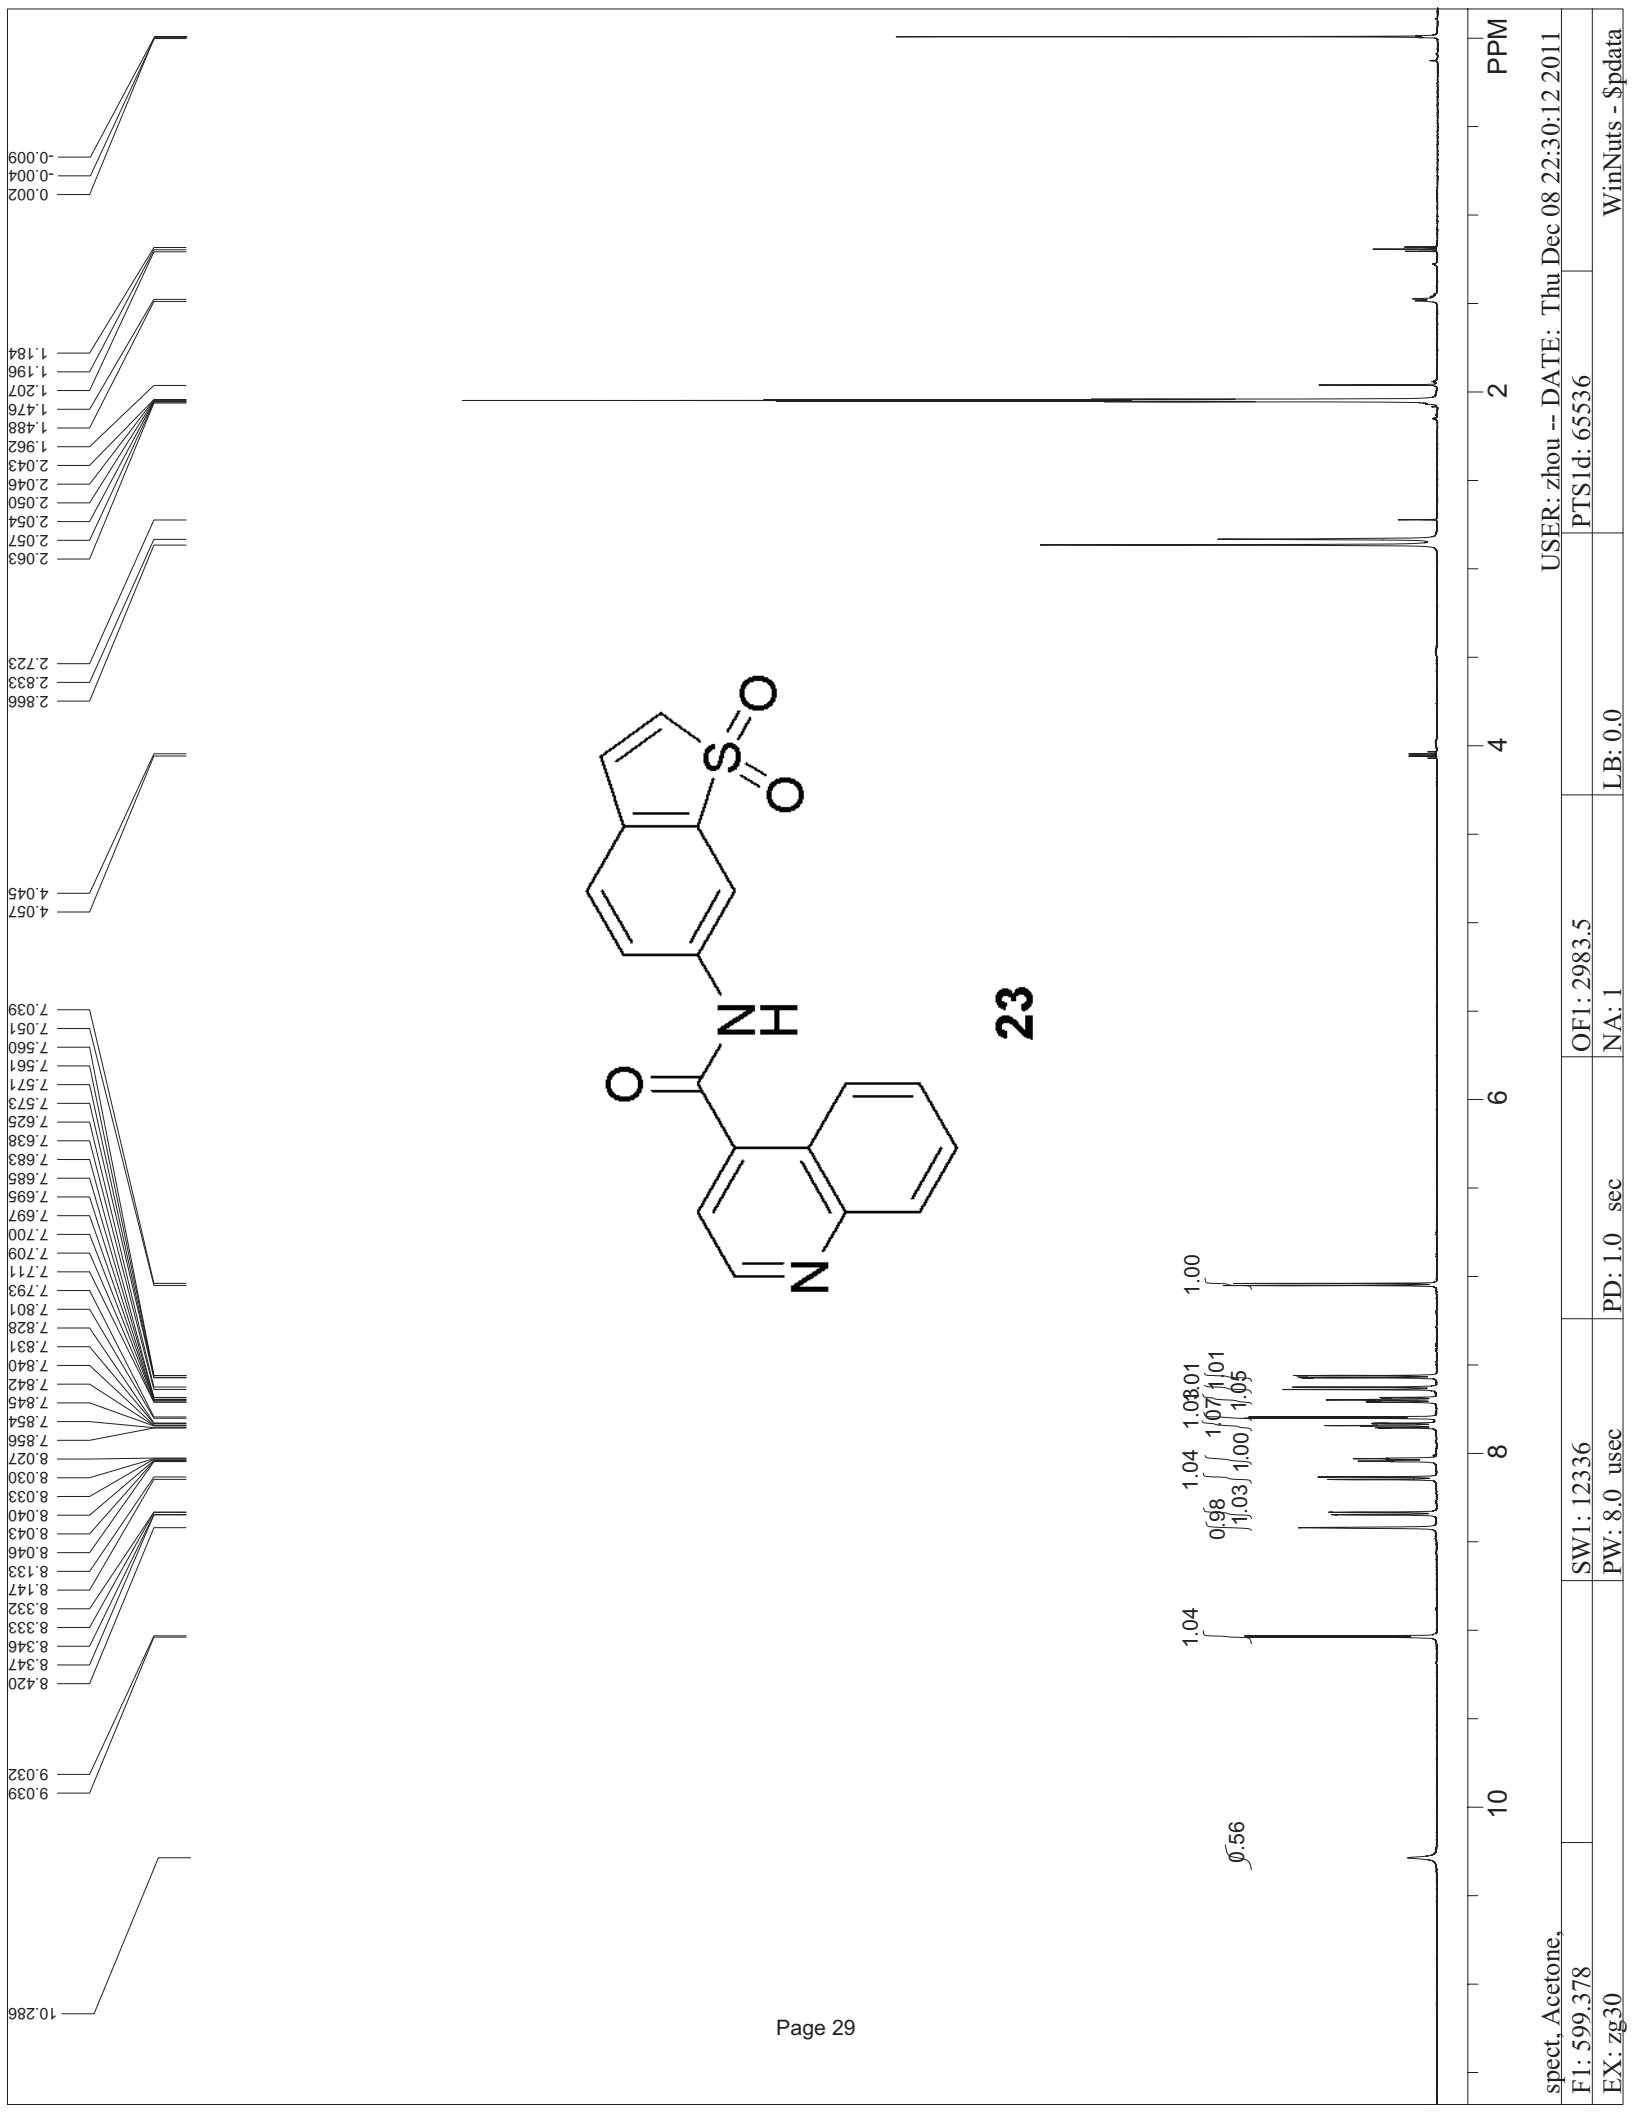

10.286  
9.039  
9.032  
8.420  
8.347  
8.346  
8.333  
8.332  
8.147  
8.133  
8.046  
8.043  
8.040  
8.033  
8.030  
8.027  
7.856  
7.854  
7.845  
7.840  
7.831  
7.828  
7.801  
7.793  
7.711  
7.709  
7.700  
7.697  
7.695  
7.685  
7.683  
7.638  
7.625  
7.573  
7.571  
7.561  
7.560  
7.551  
7.039  
4.057  
4.045  
2.866  
2.833  
2.723  
2.063  
2.057  
2.054  
2.050  
2.046  
2.043  
1.962  
1.488  
1.476  
1.207  
1.196  
1.184  
0.002  
-0.004  
-0.009

23

1.04  
0.98  
1.03  
1.04  
1.03  
1.00  
1.07  
1.01  
1.05  
1.00

PPM

166.746  
 151.008  
 149.675  
 142.359  
 139.089  
 133.104  
 131.550  
 130.742  
 128.484  
 127.725  
 127.231  
 126.309  
 125.128  
 124.781  
 124.695  
 119.999  
 113.304  
 113.225

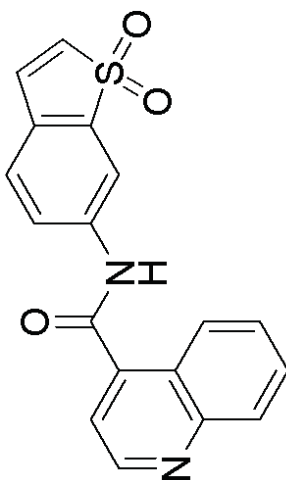

23

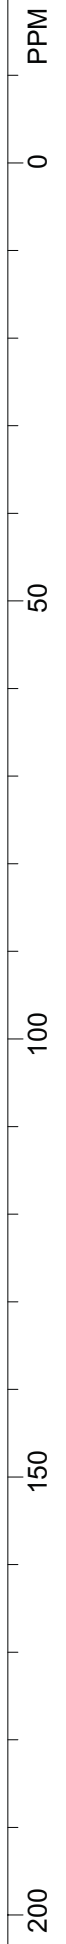

spect, Acetone, USER: zhou -- DATE: Thu Dec 08 22:33:44 2011  
 F1: 150.728 OF1: 15206.3 PTS1d: 32768  
 EX: zgig30 PD: 1.5 sec LB: 0.0 WinNuts - \$pdata
